# Supplementary material for: Determinants of imbalanced sex ratio at birth in Nepal: evidence from secondary analysis of a large hospital-based study and nationally-representative survey data
Source: PubMed Central journal article supplement — BMJ Open. 2019 Jan 30;9(1):e023021. doi: 10.1136/bmjopen-2018-023021 (PMC6359739; doi:10.1136/bmjopen-2018-023021), 2019-01-30
Supplement: bmjopen-2018-023021.draft_revisions.pdf [file bmjopen-2018-023021.draft_revisions.pdf]

# BMJ Open

BMJ Open is committed to open peer review. As part of this commitment we make the peer review history of every article we publish publicly available.

When an article is published we post the peer reviewers' comments and the authors' responses online. We also post the versions of the paper that were used during peer review. These are the versions that the peer review comments apply to.

The versions of the paper that follow are the versions that were submitted during the peer review process. They are not the versions of record or the final published versions. They should not be cited or distributed as the published version of this manuscript.

BMJ Open is an open access journal and the full, final, typeset and author-corrected version of record of the manuscript is available on our site with no access controls, subscription charges or pay-per-view fees (<http://bmjopen.bmj.com>).

If you have any questions on BMJ Open's open peer review process please email [info.bmjopen@bmj.com](mailto:info.bmjopen@bmj.com)

# BMJ Open

## Determinants of imbalanced sex ratio at birth in Nepal: evidence from secondary analysis of a large hospital-based RCT, and a nationally representative survey data

|                               |                                                                                                                                                                                                                                                                                                                                                                                                                                                                  |
|-------------------------------|------------------------------------------------------------------------------------------------------------------------------------------------------------------------------------------------------------------------------------------------------------------------------------------------------------------------------------------------------------------------------------------------------------------------------------------------------------------|
| Journal:                      | <i>BMJ Open</i>                                                                                                                                                                                                                                                                                                                                                                                                                                                  |
| Manuscript ID                 | bmjopen-2018-023021                                                                                                                                                                                                                                                                                                                                                                                                                                              |
| Article Type:                 | Research                                                                                                                                                                                                                                                                                                                                                                                                                                                         |
| Date Submitted by the Author: | 23-Mar-2018                                                                                                                                                                                                                                                                                                                                                                                                                                                      |
| Complete List of Authors:     | Pradhan, Elina; The World Bank Group, Pearson, Erin; IPAS; Johns Hopkins University Bloomberg School of Public Health<br>Puri, Mahesh; Center for Research on Environment, Population and Health Activities,<br>Maharjan, Manju; Center for Research on Environment, Population and Health Activities<br>Maharjan, Dev; Center for Research on Environment, Population and Health Activities<br>Shah, Iqbal; Harvard University T H Chan School of Public Health |
| Keywords:                     | PUBLIC HEALTH, REPRODUCTIVE MEDICINE, Health policy < HEALTH SERVICES ADMINISTRATION & MANAGEMENT                                                                                                                                                                                                                                                                                                                                                                |
|                               |                                                                                                                                                                                                                                                                                                                                                                                                                                                                  |

SCHOLARONE™  
Manuscripts

# Determinants of imbalanced sex ratio at birth in Nepal: evidence from secondary analysis of a large hospital-based RCT, and a nationally representative survey data

Elina Pradhan<sup>1</sup>, Erin Pearson<sup>2</sup>, Mahesh Puri<sup>3</sup>, Manju Maharjan<sup>3</sup>, Dev Maharjan<sup>3</sup>, and Iqbal Shah<sup>4</sup>

<sup>1</sup>The World Bank Group, Washington, D.C.

<sup>2</sup>Ipas, Chapel Hill, NC, USA

<sup>3</sup>Center for Research on Environment, Health and Population Activities (CREHPA), Kathmandu, Nepal.

<sup>4</sup>Harvard T.H. Chan School of Public Health, Boston, MA

Corresponding Author: Elina Pradhan. (T) +1 617 823 8364 (E) [epadhan@mail.harvard.edu](mailto:epadhan@mail.harvard.edu)

Word Count: 4,133

## ABSTRACT

---

**Objectives:** To quantify sex ratio at births (SRB) in hospital deliveries in Nepal, and understand the socio-demographic correlates of skewed SRB. Skewed SRBs in hospitals could be explained by sex selective abortion, and/or by decision to have a son delivered in a hospital—increased in-utero investments for male fetus. We use data on ultrasound use to quantify links between prenatal knowledge of sex, parity and skewed SRBs.

**Design:** Secondary analysis of (1) de-identified data from a randomized controlled trial, and (2) 2011 Nepal Demographic and Health Survey

**Setting:** Nepal

**Participants:** (1) 75428 women who gave birth in study hospitals, (2) DHS: 12,674 women aged 15-49

**Outcome measures:** SRB, and conditional SRB of a second child given first born male or female were calculated.

**Results:** Using data from 75,428 women who gave birth in six tertiary hospitals in Nepal between September 2015 and March 2017, we report skewed SRBs in these hospitals, with some hospitals registering deliveries of 121 male births per 100 female births. We find that a nationally representative survey (2011 DHS) reveals no difference in the number of hospital delivery of male and female babies. Additionally, we find that: (1) estimated SRB of second-order births conditional on the first being a girl is significantly higher than the biological SRB in our study and (2) multiparous women are more likely to have prenatal knowledge of the sex of their fetus and to have male births than primiparous women with the differences increasing with increasing levels of education.

**Conclusions:** Our analysis supports sex-selective abortion as the dominant cause of skewed SRBs in study hospitals. Comprehensive national policies that not only plan and enforce regulations against gender-biased abortions, but also ameliorate the marginalized status of women in Nepal are urgently required to change this alarming manifestation of son preference.

**Key words:** Sex ratio at birth, son preference, hospital deliveries, abortions, Nepal.

**Strengths and limitations of the study:**

- This is the first paper that shows highly skewed sex ratios from hospital deliveries in Nepal, and moreover, explicitly quantifies associations between ultrasound access and skewed SRBs.
- Analysis presented is based on a large sample—the primary sample is about 20% of all births in Nepal that happened during the study period.
- On the other hand, this primary sample is not representative at the population level as it is derived from a hospital-based study.
- Women’s report of abortion history, which is a mediating variable reported, could suffer from reporting bias.

## I BACKGROUND

---

Sex ratios at birth (SRB), i.e., number of male births per 100 female births, have long been shown to be skewed in China, South Korea, some states of India and in some other East and South Asian, and North African countries, but evidence suggests that since the 1990s, skewed sex ratios are emerging in other Asian countries such as Pakistan and Vietnam [1,2]. The biologically normal sex ratio at birth ranges from 102 to 107 males per 100 females with 105 as the most common figure [3,4], but in India the national SRB is 109 compared to 120 in China [1], indicating that significantly more boys are being born than girls in these two countries, especially in China. As technology such as ultrasound has become more widely available in Asia, sex ratios have become more skewed [1,5,6]. When societies with strong son preference transition to low fertility, the desire to have male offspring becomes more acute and access to the technology can facilitate its realization. Couples may use ultrasound and other prenatal diagnostic tests for sex-selective abortion, though only about 11-27% of all ultrasound users across States in India were using ultrasound for sex-selective abortion between 1998-1999 when ultrasound was first becoming more widely available [5]. Given the trajectory of increasing sex ratios over time in Asia, it is possible that the ultrasound misuse for sex-selective abortion has increased as well as social pressure for sons has intensified with shrinking family sizes. Bhat and Zavier (2007) found that wealthier, more educated women in India had greater access to technology such as ultrasound, but ultrasound misuse for sex-selective abortion was more highly associated with region and sex composition of children already born [5,7].

In Nepal, son preference has been documented, but it has primarily manifested in women's contraceptive use and preferential care for male children, including more and higher quality food and better medical care[1,8]. As a result, older studies demonstrated higher under-five female compared to male mortality in Nepal due to preferential treatment and medical care for sons, but did not demonstrate skewed sex ratios at birth [1,8]. More recent studies have demonstrated that conditional sex ratios, the sex ratio for second-born child when the first-born child was female, became skewed after abortion law was liberalized in 2002 [9]. Though sex-determination tests and sex-selective abortion are illegal in Nepal, punishable by imprisonment from 3 to 6 months [10,11], evidence suggests that it does occur [9,12]. Abortion providers report difficulty

1  
2  
3 ascertaining whether families are seeking abortion for sex-selection purposes, and fear that  
4 women will resort to unsafe abortion if they are under pressure to bear sons but unable to access  
5 safe abortion services [12]. A comparison of two districts in Nepal found that many conditions  
6 led to higher SRB in one district compared to the other, including greater access to ultrasound  
7 due to more facilities offering diagnostic services and greater purchasing power, less  
8 enforcement of the law barring sex-selective abortion, desire for fewer children, and fewer  
9 community-based programs on gender equity [10].

10  
11  
12 This is the first paper that shows highly skewed sex ratios from facility births in Nepal, and  
13 explicitly quantifies associations between ultrasound access and skewed SRBs. Women  
14 attending the facilities in the study generally have access to high quality care, including access to  
15 ultrasound technology, which is available in most study hospitals. Ultrasound may act on SRBs  
16 in these hospitals through two pathways: 1) sex-selective abortion, or 2) increased investment in  
17 delivery care for male babies. The present study explores potential pathways leading to skewed  
18 sex ratios in Nepal's largest hospitals by comparing estimates from the hospital-based sample  
19 with high access to ultrasound services to population-based estimates from Nepal's 2011  
20 Demographic and Health Survey [13]. The main objective is, therefore, to examine if skewed sex  
21 ratio at birth prevail on hospital deliveries compared to all births in a nationally representative  
22 household survey and the primary pathways leading to such outcome.

## 33 34 35 36 37 **II DATA AND METHODS**

---

### 38 39 40 41 **II.A STUDY DESIGN**

42  
43 We assess SRB by geographic divisions and socio-demographic background characteristics of  
44 women using data from a multi-site facility-based survey of postpartum women in six of the  
45 largest hospitals in Nepal and from a population-based nationally representative survey (NDHS).

### 46 47 48 49 50 **II.B DATA**

51  
52 The 2011 NDHS included 12,674 ever-married women aged 15-49, and the sample for the  
53 analysis included 4,047 births in the five years preceding the survey. The longitudinal data come

1  
2  
3 from a hospital-based survey conducted as part of an evaluation of postpartum contraceptive  
4 services in six hospitals in Nepal. The six hospital sites were: Bharatpur Regional Hospital, B.P.  
5 Koirala Institute of Health Sciences (BPKIHS), Koshi Zonal Hospital, Lumbini Zonal Hospital,  
6 Western Regional Hospital and Bheri Zonal hospital. These sites span all the way from mid-  
7 western development zone to the eastern development zone; two hospitals are in the hilly region  
8 and four in the Terai. There are also some differences in the ethnic groups served by these  
9 hospitals (Appendix Figure 1)—27% of women who gave birth in Koshi Zonal hospital are so  
10 called “untouchables” (*Dalits*) versus only 9% in BPKIHS; 48% of women served by BPKIHS  
11 are indigenous group (*Janajaatis*) versus 25% in Bheri Zonal.  
12  
13  
14  
15  
16  
17  
18

19 Women were enrolled in the study over a period of 18 months and completed a short  
20 questionnaire after delivery, before they are discharged from the hospital. A sample of those  
21 enrolled in the study were also approached for follow-up questionnaires at 9 months and 18  
22 months postpartum. Inclusion criteria are that women have had a live birth, delivered in one of  
23 the six study hospitals, and reside in Nepal. Detailed study protocol has been published [14].  
24  
25  
26  
27  
28

29 Out of a total of 75,897 women eligible for the study in the enrollment period (September 2015-  
30 March 2017), 75,587 (99.6%) consented to be interviewed, and interviews were conducted prior  
31 to discharge from hospital after delivery. The full sample used in this study constitutes of 75,428  
32 women who consented to answering questions pertaining to variables analyzed in this paper.  
33  
34  
35  
36

37 The 9-month survey captures information not available in the 2011 Nepal DHS, including a  
38 detailed assessment of ultrasound use during the recent pregnancy and previous pregnancies. The  
39 9-month survey also captures the sex composition of all children born, and conditional sex ratios  
40 for second-born child given the sex of the first-born child will be calculated and compared to our  
41 estimates from the 2011 Nepal DHS. This nine-month follow-up sample includes 14,015 women,  
42 with follow-up rate of 57.4%.  
43  
44  
45  
46  
47  
48

## 49 II.C METHODS

50

51 Sex ratios were calculated for all births by dividing the total number of boys born by the total  
52 number of girls born, and multiplying by 100. Conditional sex ratios were calculated for second  
53  
54  
55



1  
2  
3 order births. Conditional sex ratios assess the ratio of second order boys to second order girls  
4 given the sex of the first child. Conditional sex ratios are often used to provide evidence for sex-  
5 selective abortion as women who want or are pressured to have a son are likely to take action at  
6 parity two, especially in the context of shrinking family size [9,15,16]. A sex ratio or conditional  
7 sex ratio of greater than 100 indicates more boys born compared to girls, and a sex ratio of less  
8 than 100 indicates more girls born compared to boys, while the biological ratio is estimated at  
9 105 male to female births. The claim of skewed sex ratio at birth is made when the SRB  
10 calculated is statistically different from the biological SRB.  
11  
12  
13  
14  
15  
16  
17

18 Linear regression models with hospital and month fixed effects are used to estimate the  
19 association between women's socio-demographic characteristics and male birth. The hospital  
20 and month fixed effects control for any hospital-specific or time-specific changes to the  
21 outcomes unrelated to the intervention. Equation (1) below represents the multivariate model,  
22 where we interact women's education and parity to understand any multiplier effects of these  
23 two variables on male preference for woman  $i$ , hospital  $h$  and month  $t$ . We also control for  
24 region, ethnicity, woman's age, abortion history ( $X_i$ ), hospital fixed effects and month fixed  
25 effects.  
26  
27  
28  
29  
30  
31  
32

$$33 \text{ male birth}_{iht} = \alpha + \beta \text{schooling}_i + \psi \text{Parity}_i + \omega \text{schooling}_i * \text{Parity}_i + \gamma X_i + \\ 34 \sum_{h=1}^5 \delta_h H_h + \sum_{t=1}^{11} \tau_t T_t + \epsilon_{iht} \quad \text{---} \quad (1)$$

37 Outcomes for women who visit the same hospitals are likely to be correlated with each other. For  
38 example, social norms about family size and son preference could be localized in a geographic  
39 area. Hence, inference needs to be corrected for this potential correlation in each hospital cluster.  
40 Since we only have six hospitals or six clusters in our study, the standard cluster robust variance  
41 estimator can over-reject the null hypothesis [17]. We use the wild cluster bootstrap method with  
42 six-point bootstrap weight distribution to estimate the statistical significance of the effect size for  
43 all regression models [18–20].  
44  
45  
46  
47  
48  
49

50 We use questions asked in our nine-month follow-up on a subset of women randomly selected  
51 (among women who lived within 24 hours of travel time from the hospital) at the time of  
52 enrollment to understand any links between ultrasound prevalence, knowing the sex of the child  
53  
54  
55

before birth and male child born at the study hospital. Similar to model (1), equations (2) and (3) below are the models we use to understand if any of women's socio-demographic characteristics are linked with ultrasound performed during antenatal period of the current birth, and if the mother reports knowledge of sex of the child before birth.

$$ultrasound_i = \alpha + \beta schooling_i + \psi Parity_i + \omega schooling_i * Parity_i + \gamma X_i \sum_{h=1}^5 \delta_h H_h + \sum_{t=1}^{11} \tau_t T_t + \epsilon_{iht} \quad \text{--- (2)}$$

$$know\_sex\_before\_birth_i = \alpha + \beta schooling_i + \psi Parity_i + \omega schooling_i * Parity_i + \gamma X_i \sum_{h=1}^5 \delta_h H_h + \sum_{t=1}^{11} \tau_t T_t + \epsilon_{iht} \quad \text{--- (3)}$$

We then estimate sex ratio at births across mothers' education group, parity and prenatal knowledge of sex, followed by a descriptive picture of conditional SRBs in our study sample, and the DHS sample.

Finally, we perform stepwise linear regression using DHS data to understand whether boys born in the last five years were more likely to be delivered in hospitals, adjusting for women's socio-demographic characteristics (equation (4)). We could assert the dominance of female foeticide as the primary reason behind skewed SRBs if we did not find a significant relationship between hospital-based deliveries and male births.

$$hospital - based\ delivery_i = \alpha + \beta male\_child_i + \gamma X_i + \epsilon_i \quad \text{--- (4)}$$

### III RESULTS

Figure 1 shows the sex ratio at birth at the six study hospitals. The biological ratio is 105, and according to Nepal census 2011, the sex ratio at birth for Nepal is 107 [21]. The ratio of births at the study hospitals is substantially higher than either the biological ratio or the national average. We observe the highest SRB at Western Regional and Bharatpur hospital, with the ratio of 121 and 120 male births per 100 female births, respectively. The sex ratio at birth in our overall sample is also significantly higher than the national average of 107—we find that 117 male births took place in the study hospitals for every 100 female births.

1  
2  
3 Table 1, data column 1 presents association between socio-demographic factors with male births  
4 in our study hospitals based on model 1. The descriptive statistics for the variables used in this  
5 regression are tabulated in Appendix Table 1. We find that higher order births are more likely to  
6 be male, and a mother with secondary schooling having her third (or higher order) child is 18  
7 percentage points more likely to deliver a male child compared to a woman who has just given  
8 birth to her first child. Chhetri women are more likely to have male births compared to  
9 Janajaatis. There is significant interaction effect of parity and mother's education when  
10 predicting male birth. Furthermore, male birth is not associated with the mother's history of  
11 induced abortion.  
12  
13  
14  
15  
16  
17  
18  
19  
20  
21  
22  
23  
24  
25  
26  
27  
28  
29  
30  
31  
32  
33  
34  
35  
36  
37  
38  
39  
40  
41  
42  
43  
44  
45  
46  
47  
48  
49  
50  
51  
52  
53  
54  
55  
56  
57  
58  
59  
60

**Table 1: Association of socio-demographic factors with male births, ultrasound during ANC and knowledge of sex of current child before birth in study hospitals**

|                                                      | Male Birth |                   | Ultrasound during ANC |                    | Knew the sex of the current child before birth |                      |
|------------------------------------------------------|------------|-------------------|-----------------------|--------------------|------------------------------------------------|----------------------|
|                                                      | Est.       | 95% CI            | Est.                  | 95% CI             | Est.                                           | 95% CI               |
| <b>Mother's Age (Ref: &lt;20)</b>                    |            |                   |                       |                    |                                                |                      |
| 20-24                                                | 0.006      | [-0.002 - 0.014]  | 0.014**               | [0.000 - 0.028]    | -0.009                                         | [-0.026 - 0.008]     |
| 25-29                                                | 0.010      | [-0.009 - 0.025]  | 0.030***              | [0.015 - 0.044]    | 0.002                                          | [-0.017 - 0.021]     |
| ≥30                                                  | 0.014**    | [0.007 - 0.032]   | 0.043***              | [0.025 - 0.061]    | 0.040***                                       | [0.014 - 0.067]      |
| <b>Mother's Education (Ref: Secondary or higher)</b> |            |                   |                       |                    |                                                |                      |
| Primary                                              | 0.009      | [-0.006 - 0.035]  | -0.052***             | [-0.079 - -0.024]  | 0.032**                                        | [0.001 - 0.063]      |
| No schooling                                         | 0.025      | [-0.012 - 0.058]  | -0.130***             | [-0.169 - -0.089]  | 0.049***                                       | [0.015 - 0.083]      |
| <b>Parity (Ref: 1)</b>                               |            |                   |                       |                    |                                                |                      |
| 2                                                    | 0.049***   | [0.014 - 0.078]   | -0.020***             | [-0.029 - -0.011]  | 0.056***                                       | [0.041 - 0.072]      |
| ≥3                                                   | 0.178***   | [0.136 - 0.210]   | -0.028***             | [-0.045 - -0.011]  | 0.252***                                       | [0.217 - 0.289]      |
| <b>Mother's Education*Parity</b>                     |            |                   |                       |                    |                                                |                      |
| Primary*2                                            | -0.038*    | [-0.090 - 0.000]  | 0.001                 | [-0.040 - 0.042]   | -0.070***                                      | [-0.112 - -0.026]    |
| Primary*≥3                                           | -0.113***  | [-0.151 - -0.054] | -0.006                | [-0.056 - 0.043]   | -0.131***                                      | [-0.204 - -0.058]    |
| No schooling*2                                       | -0.065**   | [-0.124 - -0.011] | 0.007                 | [-0.049 - 0.064]   | -0.109***                                      | [-0.153 - -0.064]    |
| No schooling*≥3                                      | -0.139***  | [-0.198 - -0.074] | -0.050*               | [-0.104 - 0.004]   | -0.219***                                      | [-0.278 - -0.159]    |
| <b>Ethnicity (Ref: Janajaati)</b>                    |            |                   |                       |                    |                                                |                      |
| Chhetri                                              | 0.013**    | [0.002 - 0.034]   | 0.028***              | [0.017 - 0.038]    | -0.0001                                        | [-0.018 - 0.018]     |
| Hill Brahmin                                         | 0.011      | [-0.002 - 0.025]  | 0.022***              | [0.014 - 0.030]    | 0.007                                          | [-0.008 - 0.022]     |
| Madhesi                                              | 0.005      | [-0.068 - 0.049]  | -0.024**              | [-0.047 - -0.001]  | -0.005                                         | [-0.027 - 0.018]     |
| Dalit                                                | -0.005     | [-0.018 - 0.009]  | -0.015**              | [-0.030 - -0.001]  | 0.002                                          | [-0.016 - 0.020]     |
| Muslim                                               | -0.028**   | [-0.068 - -0.007] | 0.014                 | [-0.021 - 0.049]   | -0.028*                                        | [-0.058 - 0.002]     |
| Others                                               | 0.025*     | [-0.003 - 0.049]  | 0.032**               | [0.003 - 0.060]    | 0.045*                                         | [-0.002 - 0.091]     |
| <b>Region (Ref: Terai)</b>                           |            |                   |                       |                    |                                                |                      |
| Hill                                                 | 0.003      | [-0.020 - 0.011]  | -0.006                | [-0.022 - 0.010]   | -0.016                                         | [-0.043 - 0.012]     |
| Mountain                                             | 0.003      | [-0.090 - 0.042]  | -0.295                | [-51.884 - 51.213] | -0.105                                         | [-102.651 - 103.068] |
| <b>Number of Abortions (Ref: 0)</b>                  |            |                   |                       |                    |                                                |                      |
| 1                                                    | 0.0003     | [-0.022 - 0.035]  | 0.019**               | [0.003 - 0.035]    | 0.0363**                                       | [0.002 - 0.070]      |
| 2+                                                   | 0.050      | [-0.006 - 0.100]  | 0.055***              | [0.024 - 0.084]    | 0.068                                          | [-0.031 - 0.164]     |
| <b>Constant</b>                                      | 0.518***   | [0.474 - 0.551]   | 0.951***              | [0.932 - 0.970]    | 0.245***                                       | [0.217 - 0.274]      |
| Observations                                         | 75,428     |                   | 14,015                |                    | 13,113                                         |                      |
| R-squared                                            | 0.009      |                   | 0.111                 |                    | 0.077                                          |                      |

Note: Difference from null tested using wild cluster bootstrap method.  
 All regression models adjusted for hospital and month fixed effects. \*\*\* p<0.01, \*\* p<0.05, \* p<0.1.

1  
2  
3 An estimate of interest is the sex ratio at birth for education and parity, adjusted for other  
4 covariates as shown in equation 1. Figure 2 shows the sex ratio at birth across women's  
5 education and parity predicted from this model. Predicted SRB for women with at least  
6 secondary schooling who are giving birth for the first time is 105 male births/ 100 female births.  
7  
8 However, this estimate skews drastically with increasing parity. SRB for women with at least  
9 secondary schooling with parity three or higher is estimated at 224 male births per 100 female  
10 births.  
11  
12  
13  
14  
15

16 As discussed previously, there could be two pathways through which deliveries at these large  
17 tertiary hospitals are skewed by sex. One could be sex-selective abortion, which will skew the  
18 ratio of male births to female births. The other is the selective investment pathway, where  
19 families upon prior knowledge of the sex of their fetus place higher value in the health and  
20 delivery of the male fetus than of the female, and hence selectively choose to travel to a hospital  
21 to deliver a male child. We now present analysis from the nine-month follow-up to illustrate  
22 correlates of access and use of ultrasound, and women's knowledge of the sex of the fetus prior  
23 to the birth.  
24  
25  
26  
27  
28  
29  
30

31 Column 3 in Table 1 presents correlates of ultrasound conducted during antenatal period of the  
32 current birth, controlling for hospital and month fixed effects. Older women are more likely to  
33 have ultrasound conducted during the antenatal period of their current child, and ultrasound  
34 prevalence is higher among educated women compared to women with no schooling. Compared  
35 to Janajaati ethnic group, Hill Brahmins and Chhetris are more, and Madhesis and Dalits are less  
36 likely to have conducted ultrasound. Women who report history of abortion are more likely to  
37 have conducted ultrasound for their current birth.  
38  
39  
40  
41  
42  
43

44 As discussed before, facilitating or conducting sex determination tests is illegal in Nepal.  
45 However, we find that 13% of the women in our follow-up sample report knowing the sex of  
46 their child before birth. Similar to correlates of male birth, women reporting knowledge of the  
47 sex of their fetus before birth is also correlated with women's education and parity with  
48 significant interactions between these covariates (Table 1, column 5). Along the education  
49 gradient, an estimated 35% of women with at least secondary schooling at parity three or more  
50 report knowledge of the sex of their child before birth as compared to 18% of women with no  
51  
52  
53  
54  
55

1  
2  
3 schooling at the same category of parity (Figure 3). Along the parity gradient, among women  
4 with at least secondary schooling, primiparous women are 25 percentage points less likely to  
5 report that they know the sex of their child before birth.  
6  
7

8  
9 The estimated sex ratios at birth are remarkably different across women who report knowledge  
10 of sex of the current child before birth. Figure 4 illustrates SRB for women across parity,  
11 education groups and knowledge of the sex of the fetus. Consistently across all categories, we  
12 find that women who report that they know the sex of the fetus are more likely to give birth to a  
13 male child than a female child. For example, women who reported knowledge of the sex of fetus,  
14 with parity three or higher who have at least secondary schooling had 6.4 times as many boys  
15 than girls.  
16  
17  
18  
19  
20  
21

22 To further understand the interaction between parity and education, we sub-select women having  
23 their second child, and estimate the conditional sex ratio at birth across women's educational  
24 groups differentiating between those who report having a living son from their first birth to those  
25 who do not (either the first-born was a daughter, or it was a son who has passed away) (Figure  
26 5). We find that the sex of the second birth is not significantly different from the biological SRB  
27 if women already have a living son, but women with any education tend to have a significantly  
28 higher number of sons in their second birth if they do not have a living son. Women with any  
29 schooling are estimated to have 1.7 times as many sons than daughters in our study hospital in  
30 their second birth if they do not have a living son.  
31  
32  
33  
34  
35  
36  
37  
38

39 The estimates observed in the analyses shown until now are based on surveys for which  
40 enrollment took place in study hospitals, and the sample only includes women who chose to give  
41 birth in those hospitals. In the analysis below, we compare our results on estimates of conditional  
42 sex ratio at birth from the hospital sample with the nationally representative Nepal 2011 DHS  
43 data. First, we compare the sex ratio at birth of second order births for those without male  
44 siblings across study data and NDHS (Figure 6). Similar to the hospital sample estimates, we  
45 find that the NDHS estimates of sex ratio at birth of second order births conditional on not  
46 having a living male sibling is significantly higher than biological SRB, at 150 male births per  
47 100 female births.  
48  
49  
50  
51  
52  
53  
54  
55

1  
2  
3 In Figure 7, we illustrate any differentials in sex ratio of all births versus second order births  
4 conditional on having an older sister, in analysis similar to Frost et al. (2013) using the nationally  
5 representative NDHS data. Compared to all births in the past three years, the sex ratio of second  
6 order births with an older girl sibling is higher by 13 points—the sex ratio at birth of second  
7 order births who do not have a living male sibling is 132. Mothers with at least secondary  
8 schooling are much more likely to bear a son in the second birth conditional on not having a  
9 living son—on average, women with at least secondary schooling have 107 boys to 100 girls, but  
10 if they have a girl as a first born or if their first-born son has passed away, they are 1.5 times  
11 more likely to have a son rather than a daughter for their second child. Differences in SRB across  
12 first birth and conditional second birth also hold across the wealth quintile-levels in the 2011  
13 DHS, although the differences are not statistically significant likely because of small sample size  
14 of the conditional SRB estimates.  
15  
16  
17  
18  
19  
20  
21  
22  
23

24  
25 We tabulate the results of stepwise regression associating male babies and hospital-based  
26 delivery adjusting for mother's sociodemographic characteristics in Table 2. We find that boys  
27 are not more likely to be delivered in hospitals as compared to girls. As the corresponding data  
28 columns in Table 2 show, the link between hospital-based births and sex of the child is not  
29 significant across the different levels of stepwise regression.  
30  
31  
32  
33  
34  
35  
36  
37  
38  
39  
40  
41  
42  
43  
44  
45  
46  
47  
48  
49  
50  
51  
52  
53  
54  
55  
56  
57  
58  
59  
60

**Table 2: Association between hospital-based delivery and male births in Nepal DHS, stepwise regression**

|                                                      | Dependent variable: Hospital-based delivery |                   |                   |                   |                   |                   |                   |
|------------------------------------------------------|---------------------------------------------|-------------------|-------------------|-------------------|-------------------|-------------------|-------------------|
|                                                      | (1)                                         | (2)               | (3)               | (4)               | (5)               | (6)               | (7)               |
| <b>Male child</b>                                    | 0.003                                       |                   | -0.005            | -0.025            | -0.023            | -0.022            | -0.014            |
|                                                      | [-0.025 - 0.030]                            |                   | [-0.031 - 0.021]  | [-0.077 - 0.026]  | [-0.074 - 0.027]  | [-0.072 - 0.028]  | [-0.063 - 0.034]  |
| <b>Mother's Education (Ref: Secondary or higher)</b> |                                             |                   |                   |                   |                   |                   |                   |
| Primary                                              |                                             | -0.231***         | -0.231***         | -0.256***         | -0.218***         | -0.200***         | -0.081**          |
|                                                      |                                             | [-0.282 - -0.180] | [-0.282 - -0.180] | [-0.322 - -0.191] | [-0.284 - -0.152] | [-0.266 - -0.133] | [-0.147 - -0.016] |
| No schooling                                         |                                             | -0.335***         | -0.335***         | -0.347***         | -0.253***         | -0.247***         | -0.101***         |
|                                                      |                                             | [-0.381 - -0.288] | [-0.382 - -0.288] | [-0.402 - -0.292] | [-0.310 - -0.196] | [-0.303 - -0.191] | [-0.156 - -0.045] |
| <b>Male child*<i>Mother's education</i></b>          |                                             |                   |                   |                   |                   |                   |                   |
| Male child, Primary                                  |                                             |                   |                   | 0.048             | 0.049             | 0.045             | 0.048             |
|                                                      |                                             |                   |                   | [-0.024 - 0.120]  | [-0.023 - 0.121]  | [-0.027 - 0.116]  | [-0.022 - 0.118]  |
| Male child, No schooling                             |                                             |                   |                   | 0.023             | 0.012             | 0.011             | 0.011             |
|                                                      |                                             |                   |                   | [-0.034 - 0.080]  | [-0.043 - 0.068]  | [-0.044 - 0.067]  | [-0.042 - 0.065]  |
| <b>Parity (Ref: 1)</b>                               |                                             |                   |                   |                   |                   |                   |                   |
| 2                                                    |                                             |                   |                   |                   | -0.096***         | -0.129***         | -0.121***         |
|                                                      |                                             |                   |                   |                   | [-0.143 - -0.050] | [-0.175 - -0.083] | [-0.163 - -0.079] |
| ≥3                                                   |                                             |                   |                   |                   | -0.210***         | -0.277***         | -0.227***         |
|                                                      |                                             |                   |                   |                   | [-0.253 - -0.167] | [-0.327 - -0.228] | [-0.276 - -0.178] |
| <b>Mother's Age (Ref: &lt;20)</b>                    |                                             |                   |                   |                   |                   |                   |                   |
| 20-24                                                |                                             |                   |                   |                   |                   | 0.078**           | 0.047             |
|                                                      |                                             |                   |                   |                   |                   | [0.016 - 0.140]   | [-0.011 - 0.106]  |
| 25-29                                                |                                             |                   |                   |                   |                   | 0.157***          | 0.100***          |
|                                                      |                                             |                   |                   |                   |                   | [0.089 - 0.225]   | [0.036 - 0.165]   |
| >=30                                                 |                                             |                   |                   |                   |                   | 0.151***          | 0.110***          |
|                                                      |                                             |                   |                   |                   |                   | [0.076 - 0.226]   | [0.040 - 0.181]   |
| <b>Household wealth tertile (Ref: Poor)</b>          |                                             |                   |                   |                   |                   |                   |                   |
| Middle                                               |                                             |                   |                   |                   |                   |                   | 0.104***          |
|                                                      |                                             |                   |                   |                   |                   |                   | [0.065 - 0.144]   |
| Rich                                                 |                                             |                   |                   |                   |                   |                   | 0.353***          |
|                                                      |                                             |                   |                   |                   |                   |                   | [0.299 - 0.407]   |
| Constant                                             | 0.281***                                    | 0.484***          | 0.487***          | 0.498***          | 0.573***          | 0.493***          | 0.258***          |
|                                                      | [0.248 - 0.313]                             | [0.441 - 0.528]   | [0.441 - 0.533]   | [0.447 - 0.549]   | [0.521 - 0.625]   | [0.423 - 0.564]   | [0.186 - 0.331]   |
| Observations                                         | 4,047                                       | 4,047             | 4,047             | 4,047             | 4,047             | 4,047             | 4,047             |
| R-squared                                            | 0.000                                       | 0.108             | 0.109             | 0.109             | 0.137             | 0.146             | 0.225             |

Note: Standard errors clustered at the primary sampling unit level.



## IV DISCUSSION

---

Our analysis show evidence of skewed sex ratio of deliveries in six large public hospitals in Nepal. Consistent with the literature on determinants of son-preference and sex-selective abortion, we show that male birth in the study hospitals is correlated with higher parity births and higher education of mothers. Using the nationally representative NDHS, we also find that male babies are no more likely to be delivered in hospitals than female babies, adjusting for the mother's sociodemographic characteristics, which suggests sex-selective abortion as the primary reason behind skewed SRBs.

We find that more educated women, and women having higher parity births are more likely to use sex-determination tests for the child. Similar to Frost et al. (2013) [9], we show that the gender imbalance is higher in second order births compared to all births in our study sample, and these differences are larger in more educated women, and women from richer households. With increasing preference for smaller family size and persistent son preference, households face the pressure of balancing the sex of their children while having a small family size. Consistent with the literature from India discussed in the background section, women with more resources and more knowledge have greater access to ultrasound technologies, but the extent of use of these technologies for sex-selective abortion was dependent on sex composition of their children who were already born [5].

We did not find male birth to be significantly correlated with the mother's abortion history. This could be interpreted in two ways. If the abortion reporting is accurate, then the skewed sex ratio in the hospital births could be attributed to the additional investment pathway, which is that the knowledge of the sex of the fetus led to the family delivering the male fetus in the hospital. However, abortion is often underreported in which case male birth might be correlated with the true, but unknown, abortion history. In this case, the first pathway of female foeticide is a likely explanation for skewed SRB. Families and women who have undergone sex-selective abortion may be differentially more likely to report that they do not have a history of induced abortion, in which case the estimate of abortion history on male birth will be an underestimate.

1  
2  
3 A major limitation of this study is potential reporting bias on key mediating parameters. Women  
4 are likely to under-report experience of induced abortion which could be an important  
5 explanatory link in understanding the skewed SRBs. Furthermore, even though 13% of the  
6 women in the survey reported knowing the sex of the child despite sex-determination tests being  
7 illegal in Nepal, the women who were conscious of the illegal nature of the tests could have  
8 chosen to not report that they conducted in-utero sex-determination tests for their current birth.  
9 Hence, the knowledge of the sex of the current birth before delivery could also be underreported.

10  
11 Another potential limitation of the study is that there is considerable loss to follow up for the  
12 sample that the prenatal sex knowledge questions are derived from. However, comparison of the  
13 covariates between the full sample and the follow up sample (Appendix Table 2) shows that  
14 women in the two samples have about the same distribution of age, educational levels, parity,  
15 male births, and history of induced abortions.

16  
17 We contribute to the literature by reporting on skewed sex ratio at birth in Nepal across socio-  
18 demographic characteristics, using a large sample which accounts for about 20% of all births in  
19 Nepal during the study period. We find that women's education, which is a proxy variable for  
20 measuring access to health services (mainly knowledge), and parity are important correlates of  
21 male births and reports of sex-determination tests. The large sample size also adds to the  
22 significance and validity of our results. Comparing conditional SRBs in nationally representative  
23 NDHS and in the hospital sample we find that SRB for all births (not only hospital births) was  
24 significantly higher for second order births if the first order birth was a girl, which suggests the  
25 sex-selective abortion pathway. Additional findings on (1) women reporting knowledge of the  
26 sex of the fetus and significantly differential SRBs across the socio-economic groups, and (2) no  
27 correlation of male births with facility deliveries using the nationally representative sample  
28 further support the sex-selection abortion pathway.

29  
30 Nepal has seen a rapid decline in actual and desired fertility rates over the last forty years.  
31 However, the reduction in desired fertility exists in a society with persistent preferences for a  
32 son, because of cultural and religious norms, and economic rationale. Aside from the religious  
33 norms such as sons being necessary to perform death rituals in Hinduism, parents have an  
34 economic incentive to have sons in an environment where (1) strong filial (social and financial)

1  
2  
3 ties exist between parents and children, (2) women are not able to realize their full economic  
4 earning potential, and (3) daughters are considered to “belong” to another family after marriage.  
5 The marginalized status of women, coupled with increasing access to sex-selection technology  
6 and lack or weak enforcement of the law is further skewing sex ratio at births in Nepal.  
7  
8  
9

10  
11 Imbalanced sex ratios at birth (SRB) are not immutable as evidenced from South Korea. SRBs  
12 in South Korea rose from 109 in 1985 to 115 in 1994, but then declined reaching 105 in 2016  
13 [22]. Most remarkable are the 2016 SRB figures by birth order –104 for the first order births, 105  
14 for the second, and 107 for the (fewer) third or higher order births. This transition to balanced  
15 SRB has been achieved by a combination of factors resulting in raising the status and  
16 empowerment of women [23]. Increased opportunities for higher education and better  
17 employment contributed to women’s autonomy coupled with laws and policies addressing  
18 women’s rights. The law recognizing women’s inheritance and other rights within their birth  
19 family following marriage contributed to redressing the traditional gender imbalance that existed  
20 in Korea. Media campaigns such as “Love your daughters” and other measures such as strict  
21 enforcement of laws prohibiting the misuse of technology for sex determination, increased  
22 exposure to mass media, weakening of traditional patrilineal norms with increasing urbanization  
23 and industrialization and expansion of nuclear families all contributed to bringing down SRB to  
24 the normal biological level in the country [24–26]. As exemplified by the South Korean  
25 experience, it is possible to bring down the skewed SRB to the normal level by systematic and  
26 multi-pronged efforts.  
27  
28  
29  
30  
31  
32  
33  
34  
35  
36  
37  
38  
39

40 Bongaarts and Guilmoto (2015) predict that the preference for sons and gender discriminations  
41 faced by the female sex from before birth that continues over a lifetime has manifested as three  
42 million excess female deaths every year globally, or 150 million missing women by 2035 [27].  
43 Our findings highlight the marginalized status of women in Nepal, and stress the urgent need for  
44 research and implementation of policies that reduce son preference and ultimately, skewed sex  
45 ratios. National strategies to prevent misuse of ultrasound services and gender-biased sex  
46 selection that do not hinder women’s access to safe abortion services are needed. Most  
47 importantly, comprehensive interventions with a mix of laws, policies and advocacy campaigns  
48  
49  
50  
51  
52  
53  
54  
55  
56  
57  
58  
59  
60

1  
2  
3 that aim to improve the status of women and eliminate gender-based discrimination are needed to  
4 achieve a balanced sex ratio at birth and subsequent survival and quality of life.  
5  
6

7 **Figure 1: Sex ratio at birth at study hospitals**

8  
9 **Figure 2: Predicted sex ratio at birth across women's education and parity**

10  
11 **Figure 3: Predicted knowledge of sex of current child before birth across women's education and**  
12 **parity**

13  
14 **Figure 4: Sex ratio at birth across women's education, parity and knowledge of sex of child before**  
15 **birth**

16  
17 **Figure 5: Sex ratio at birth of second birth order across women's education and living male child.**

18  
19 **Figure 6: Conditional sex ratio at birth of second order birth with no male sibling, comparison**  
20 **between hospital sample (study) and Nepal DHS across education groups**

21  
22 **Figure 7: Sex ratio at birth across socio-demographic characteristics between all births in the last**  
23 **three years, and second order births conditional on having an older sister**  
24  
25  
26  
27  
28  
29  
30  
31  
32  
33  
34  
35  
36  
37  
38  
39  
40  
41  
42  
43  
44  
45  
46  
47  
48  
49  
50  
51  
52  
53  
54  
55  
56  
57  
58  
59  
60

1  
2  
3 **Acknowledgments:** The analysis in this study is made possible with the time and effort by the  
4 women in the PPIUD project who participated in the research study about a day after giving  
5 birth. The authors would like to thank these women, and the thousands of women who took their  
6 time in participating in the 2011 Nepal DHS. We would also like to acknowledge the valiant  
7 effort from thousands of enumerators and program staff in the DHS and PPIUD project.  
8  
9

10 We are grateful to Nepal Society of Obstetricians and Gynaecologists (NESOG) and  
11 International Federation of Obstetricians and Gynaecologists (FIGO) for implementing the  
12 intervention in the parent study that the paper is based on.  
13  
14

15  
16 **Contributorship statement:** EP and ErP analysed the data and wrote the first draft of the  
17 manuscript. MP serves as principal investigator of the parent study. EP, ErP, MP, IS, MM and  
18 DM contributed to the development or revision of study instrument, or reviewed the manuscript  
19 and provided scientific oversight. EP, ErP, MP and IS read, edited and approved the final  
20 manuscript.  
21  
22

23 **Competing Interests:** None  
24  
25

26 **Funding:** This study was funded by a grant to the Harvard T. H. Chan School of Public Health  
27 from the Susan Thompson Buffett Foundation. The funding source had no role in the design,  
28 implementation, data collection, analysis and interpretation of results or in dissemination of  
29 findings.  
30  
31

32 **Ethics approval and consent to participate:** The study was approved by the Nepal Health  
33 Research Council, Nepal (#51/2015).  
34  
35

36 **Patient and Public Involvement:** The patients and the public were not directly involved in the  
37 development of research question, outcome measures, or the design of the study. Respondents  
38 were women who delivered in the study hospitals and provided consent to participate in the  
39 study. The research question was informed by the available data on the status of women in the  
40 country and the region, and the results are being incorporated in an early preparation state of  
41 Nepal's national strategy to prevent gender-biased sex selection.  
42  
43

44 **Availability of data and materials:** The Demographic and health survey data is available from  
45 [the DHS program website](#). A sample of data from the parent longitudinal study will be made  
46 available for replication study upon request. The entire data set will also be made public at the  
47 end of the study. All data requests should be sent to the Program Coordinator Ms. Laura  
48 Campagna at [lcampagn@hsph.harvard.edu](mailto:lcampagn@hsph.harvard.edu).  
49  
50  
51  
52  
53  
54  
55

## REFERENCES

---

- 1 Guilmoto CZ. The Sex Ratio Transition in Asia. *Popul Dev Rev* 2009;**35**:519–49. doi:10.1111/j.1728-4457.2009.00295.x
- 2 Bélanger D, Thi Hai Oanh K, Jianye L, *et al.* Les rapports de masculinité à la naissance augmentent-ils au Vietnam ? *Population* 2003;**58**:255. doi:10.3917/popu.302.0255
- 3 Parazzini F, La Vecchia C, Levi F, *et al.* Trends in male:female ratio among newborn infants in 29 countries from five continents. *Hum Reprod* 1998;**13**:1394–6. doi:10.1093/humrep/13.5.1394
- 4 World Bank. World Development Indicators 2017. Washington, D.C.: : World Bank 2017.
- 5 Attane I (ed ), Demography C for IC in NR in, Eng P (France), *et al.* Watering the neighbour's garden: the growing demographic female deficit in Asia. Published Online First: 2007.<http://agris.fao.org/agris-search/search.do?recordID=XF2015028131> (accessed 28 Sep 2016).
- 6 Gupta MD, Chung W, Shuzhuo L. Evidence for an Incipient Decline in Numbers of Missing Girls in China and India. *Popul Dev Rev* 2009;**35**:401–16. doi:10.1111/j.1728-4457.2009.00285.x
- 7 Bhat PNM, Zavier AJF. Factors Influencing the Use of Prenatal Diagnostic Techniques and the Sex Ratio at Birth in India. *Econ Polit Wkly* 2007;**42**:2292–303.
- 8 Leone T, Matthews Z, Zuanna GD. Impact and Determinants of Sex Preference in Nepal. *Int Fam Plan Perspect* 2003;**29**:69–75. doi:10.2307/3181060
- 9 Frost MD, Puri M, Hinde PRA. Falling sex ratios and emerging evidence of sex-selective abortion in Nepal: evidence from nationally representative survey data. *BMJ Open* 2013;**3**:e002612. doi:10.1136/bmjopen-2013-002612
- 10 Puri M, Tamang A. *Understanding factors influencing adverse sex ratios at birth and exploring what works to achieve balance: The situation in selected districts of Nepal.* Kathmandu, Nepal: : CREHPA 2015.
- 11 Government of Nepal. National Safe Abortion Service Policy, 2060 B.S.
- 12 Lamichhane P, Harken T, Puri M, *et al.* Sex-Selective Abortion in Nepal: A Qualitative Study of Health Workers' Perspectives. *Womens Health Issues* 2011;**21**:S37–41. doi:10.1016/j.whi.2011.02.001

- 1  
2  
3 13 Ministry of Health and Population (MOHP) [Nepal], New ERA, and Macro International  
4 Inc. Nepal Demographic and Health Survey 2011. Kathmandu, Nepal: : Ministry of Health  
5 and Population, New ERA, and Macro International Inc. 2012.  
6  
7  
8 14 Canning D, Shah IH, Pearson E, *et al.* Institutionalizing postpartum intrauterine device  
9 (IUD) services in Sri Lanka, Tanzania, and Nepal: study protocol for a cluster-randomized  
10 stepped-wedge trial. *BMC Pregnancy Childbirth* 2016;**16**:362. doi:10.1186/s12884-016-  
11 1160-0  
12  
13 15 Jha P, Kumar R, Vasa P, *et al.* Low male-to-female sex ratio of children born in India:  
14 national survey of 1.1 million households. *The Lancet* 2006;**367**:211–8. doi:10.1016/S0140-  
15 6736(06)67930-0  
16  
17 16 Jha P, Kesler MA, Kumar R, *et al.* Trends in selective abortions of girls in India: analysis of  
18 nationally representative birth histories from 1990 to 2005 and census data from 1991 to  
19 2011. *The Lancet* 2011;**377**:1921–8. doi:10.1016/S0140-6736(11)60649-1  
20  
21  
22 17 Bertrand M, Duflo E, Mullainathan S. How Much Should We Trust Differences-In-  
23 Differences Estimates? *Q J Econ* 2004;**119**:249–75. doi:10.1162/003355304772839588  
24  
25 18 Cameron AC, Gelbach JB, Miller DL. Bootstrap-Based Improvements for Inference with  
26 Clustered Errors. *Rev Econ Stat* 2008;**90**:414–27. doi:10.1162/rest.90.3.414  
27  
28 19 Webb MD. Reworking Wild Bootstrap Based Inference for Clustered Errors. Queen's  
29 University, Department of Economics 2014. <https://ideas.repec.org/p/qed/wpaper/1315.html>  
30 (accessed 16 Dec 2016).  
31  
32 20 Roodman D. *BOOTTEST: Stata module to provide fast execution of the wild bootstrap with*  
33 *null imposed.* Boston College Department of Economics 2016.  
34 <https://ideas.repec.org/c/boc/bocode/s458121.html> (accessed 16 Dec 2016).  
35  
36  
37 21 Central Bureau of Statistics. *Population Monograph of Nepal.* Kathmandu, Nepal: : National  
38 Planning Commission Secretariat, Government of Nepal 2014.  
39  
40 22 Statistics Korea, Republic of Korea. Korean statistical information service.  
41 <http://kosis.kr/eng/> (accessed 12 Jan 2018).  
42  
43 23 Chung W, Gupta MD. The Decline of Son Preference in South Korea: The Roles of  
44 Development and Public Policy. *Popul Dev Rev* 2007;**33**:757–83. doi:10.1111/j.1728-  
45 4457.2007.00196.x  
46  
47 24 Park CB, Cho N-H. Consequences of Son Preference in a Low-Fertility Society: Imbalance  
48 of the Sex Ratio at Birth in Korea. *Popul Dev Rev* 1995;**21**:59–84. doi:10.2307/2137413  
49  
50 25 Hesketh T, Lu L, Xing ZW. The consequences of son preference and sex-selective abortion  
51 in China and other Asian countries. *Can Med Assoc J* 2011;**183**:1374–7.  
52 doi:10.1503/cmaj.101368  
53  
54  
55

- 1  
2  
3 26 Chun H, Das Gupta M. Gender discrimination in sex selective abortions and its transition in  
4 South Korea. *Womens Stud Int Forum* 2009;**32**:89–97. doi:10.1016/j.wsif.2009.03.008  
5  
6  
7 27 Bongaarts J, Guilmo CZ. How Many More Missing Women? Excess Female Mortality and  
8 Prenatal Sex Selection, 1970–2050. *Popul Dev Rev* 2015;**41**:241–69. doi:10.1111/j.1728-  
9 4457.2015.00046.x  
10  
11  
12  
13  
14  
15  
16  
17  
18  
19  
20  
21  
22  
23  
24  
25  
26  
27  
28  
29  
30  
31  
32  
33  
34  
35  
36  
37  
38  
39  
40  
41  
42  
43  
44  
45  
46  
47  
48  
49  
50  
51  
52  
53  
54  
55  
56  
57  
58  
59  
60

For peer review only



1  
2  
3  
4  
5  
6  
7  
8  
9  
10  
11  
12  
13  
14  
15  
16  
17  
18  
19  
20  
21  
22  
23  
24  
25  
26  
27  
28  
29  
30  
31  
32  
33  
34  
35  
36  
37  
38  
39  
40  
41  
42  
43  
44  
45  
46  
47  
48  
49  
50  
51  
52  
53  
54  
55  
56  
57  
58  
59  
60

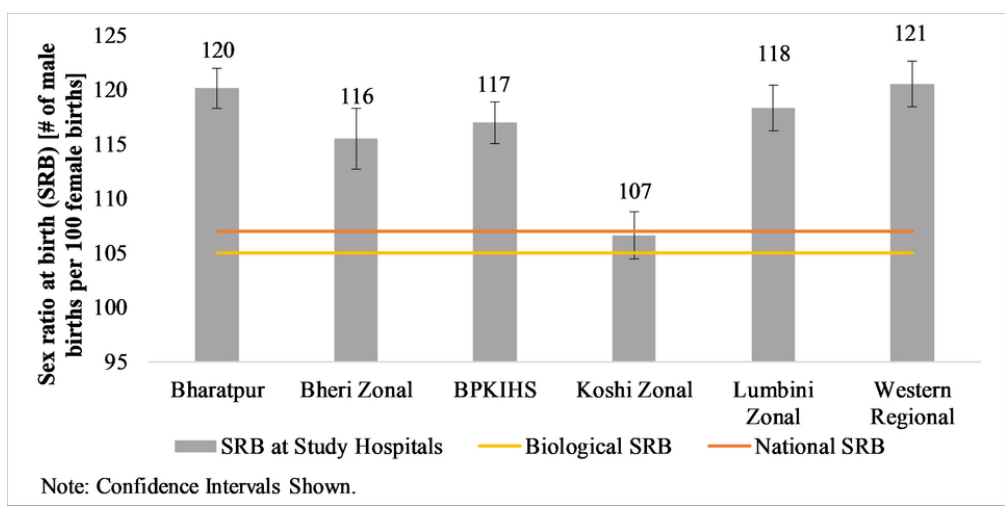

Figure 1: Sex ratio at birth at study hospitals

81x40mm (300 x 300 DPI)

1  
2  
3  
4  
5  
6  
7  
8  
9  
10  
11  
12  
13  
14  
15  
16  
17  
18  
19  
20  
21  
22  
23  
24  
25  
26  
27  
28  
29  
30  
31  
32  
33  
34  
35  
36  
37  
38  
39  
40  
41  
42  
43  
44  
45  
46  
47  
48  
49  
50  
51  
52  
53  
54  
55  
56  
57  
58  
59  
60

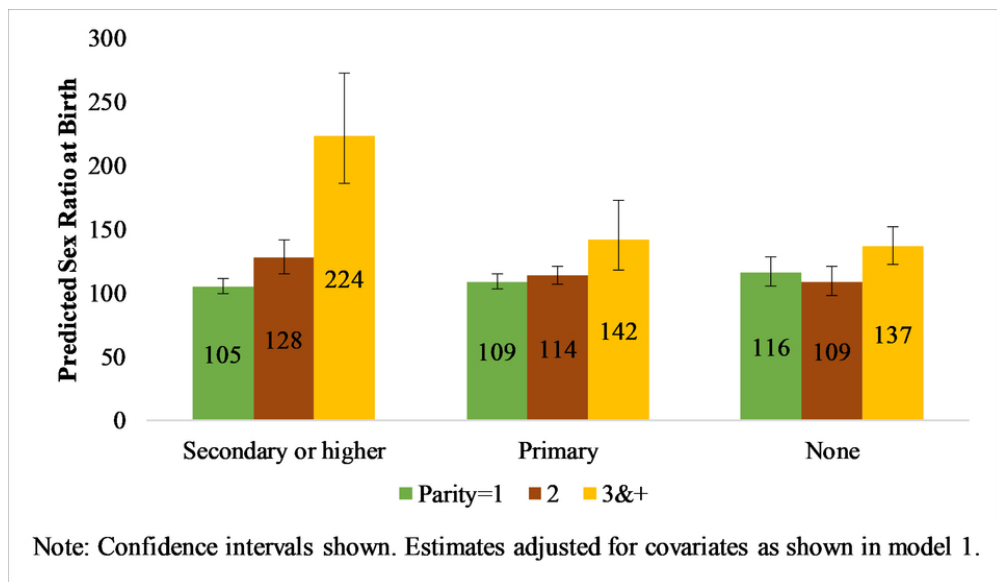

Figure 2: Predicted sex ratio at birth across women's education and parity

81x46mm (300 x 300 DPI)

1  
2  
3  
4  
5  
6  
7  
8  
9  
10  
11  
12  
13  
14  
15  
16  
17  
18  
19  
20  
21  
22  
23  
24  
25  
26  
27  
28  
29  
30  
31  
32  
33  
34  
35  
36  
37  
38  
39  
40  
41  
42  
43  
44  
45  
46  
47  
48  
49  
50  
51  
52  
53  
54  
55  
56  
57  
58  
59  
60

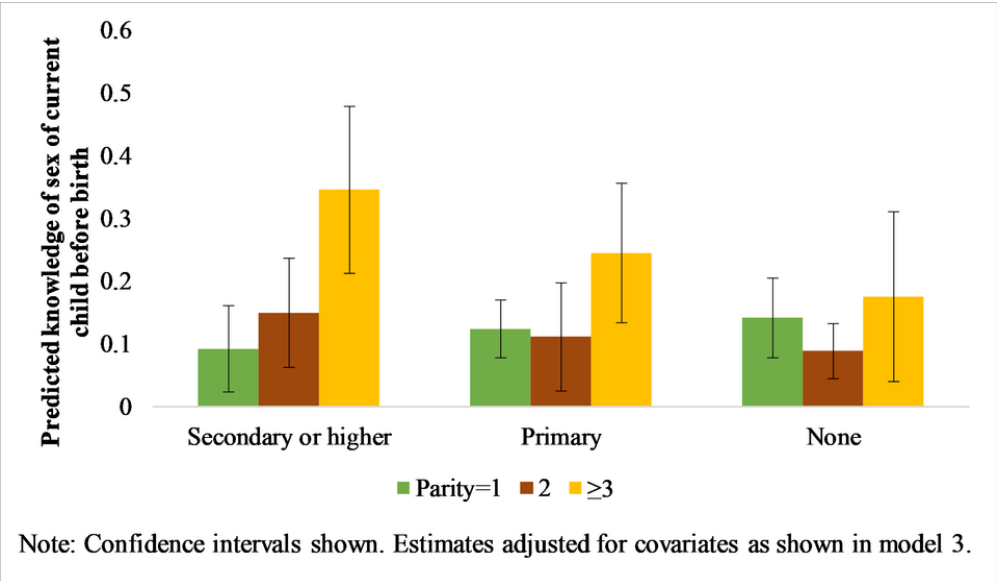

Figure 3: Predicted knowledge of sex of current child before birth across women's education and parity

81x47mm (300 x 300 DPI)

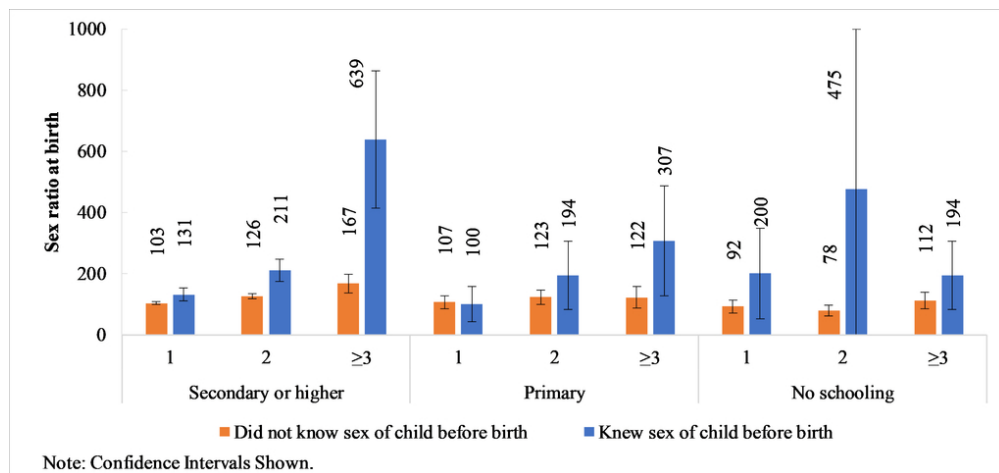

Figure 4: Sex ratio at birth across women's education, parity and knowledge of sex of child before birth

86x40mm (300 x 300 DPI)

1  
2  
3  
4  
5  
6  
7  
8  
9  
10  
11  
12  
13  
14  
15  
16  
17  
18  
19  
20  
21  
22  
23  
24  
25  
26  
27  
28  
29  
30  
31  
32  
33  
34  
35  
36  
37  
38  
39  
40  
41  
42  
43  
44  
45  
46  
47  
48  
49  
50  
51  
52  
53  
54  
55  
56  
57  
58  
59  
60

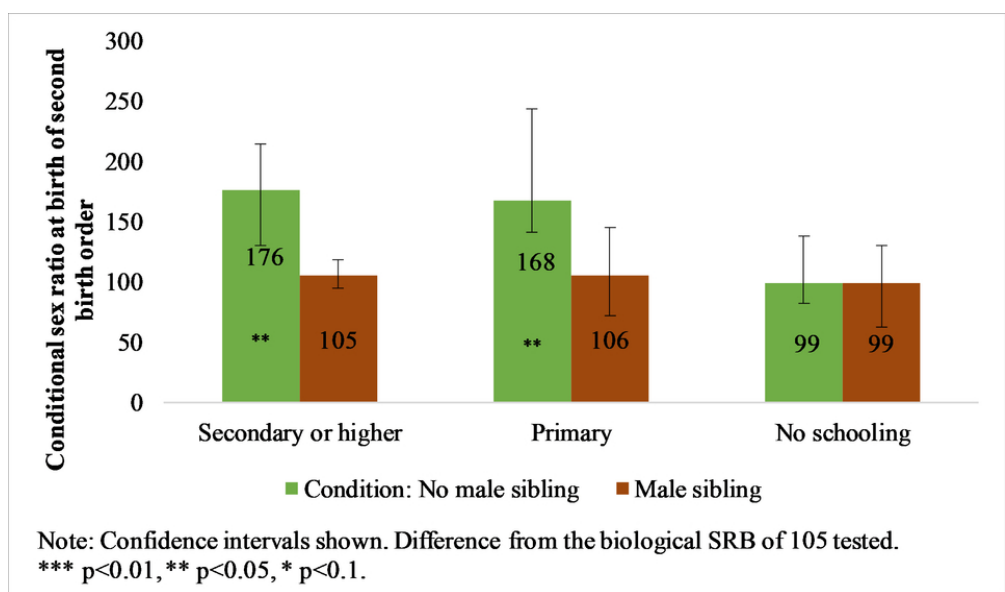

Figure 5: Sex ratio at birth of second birth order across women's education and living male child.

81x47mm (300 x 300 DPI)

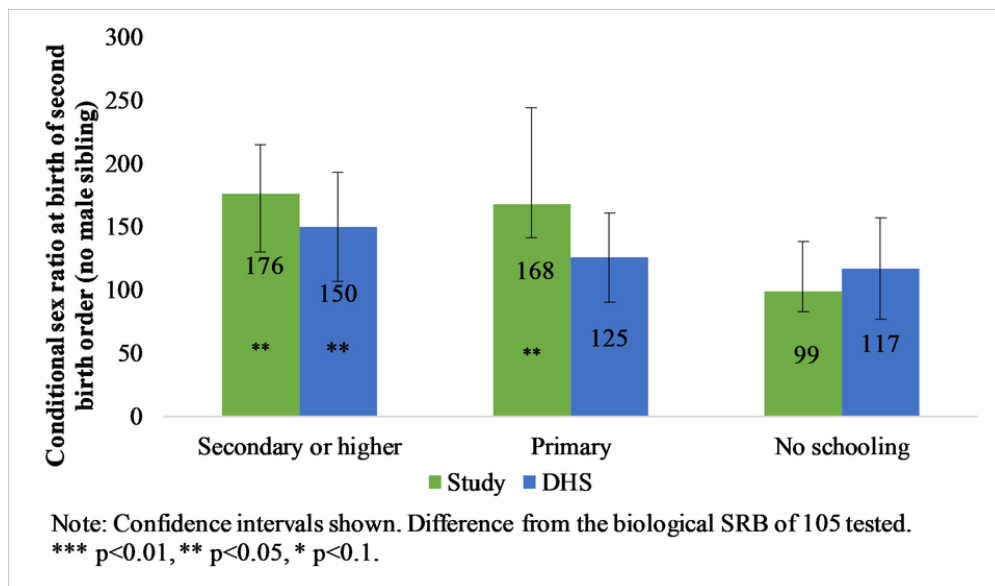

Figure 6: Conditional sex ratio at birth of second order birth with no male sibling, comparison between hospital sample (study) and Nepal DHS across education groups

81x47mm (300 x 300 DPI)

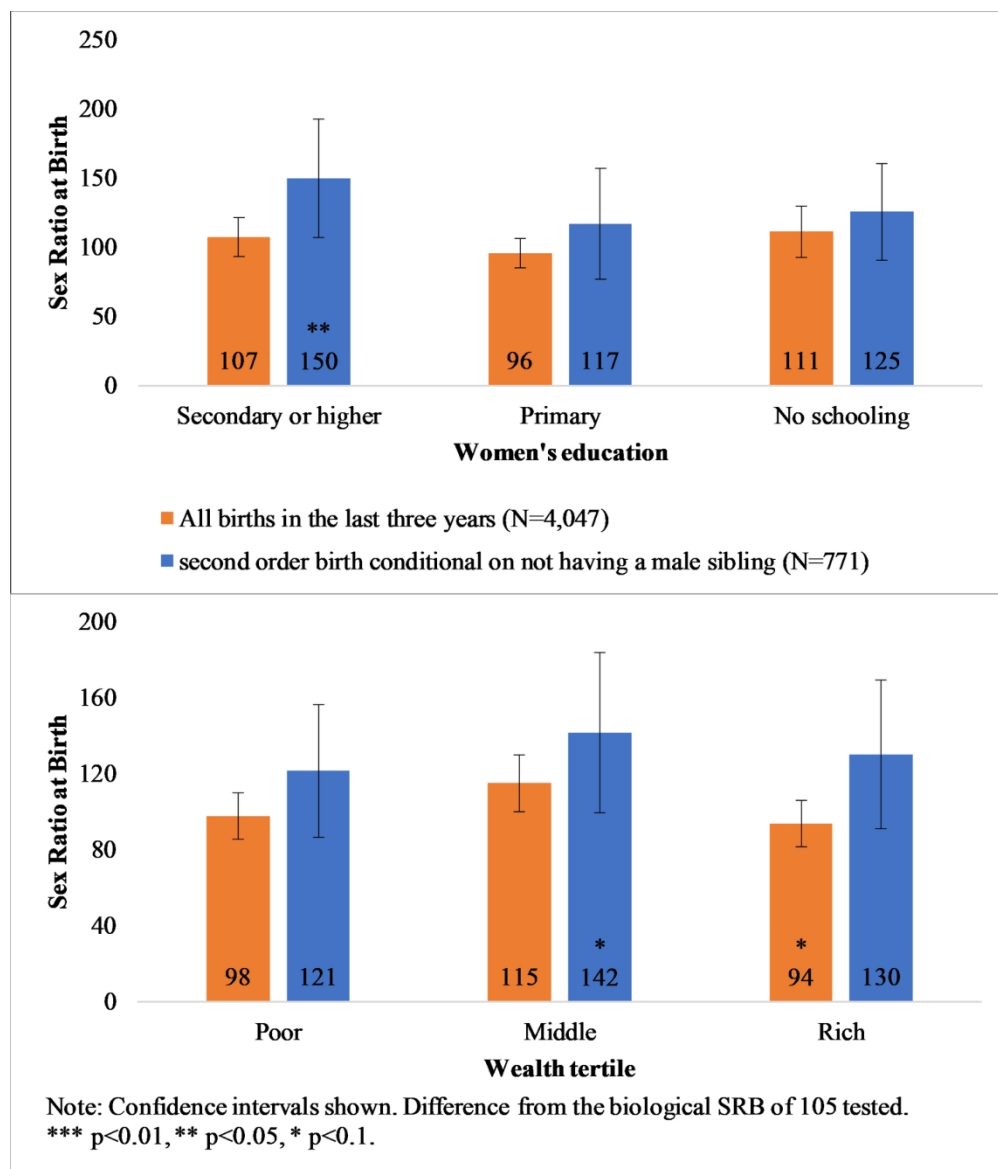

Figure 7: Sex ratio at birth across socio-demographic characteristics between all births in the last three years, and second order births conditional on having an older sister

162x189mm (300 x 300 DPI)

APPENDIX

Appendix Figure 1: Composition of ethnic groups seeking care in study hospitals

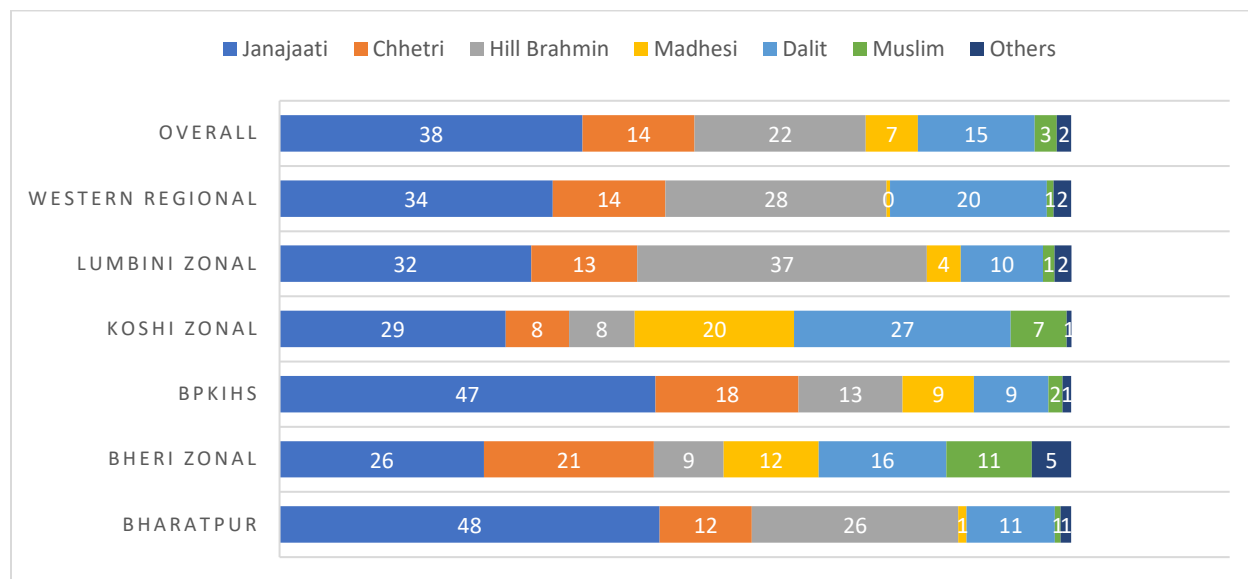

review only



Appendix Table 1: Descriptive statistics for study data

|                                                                      | Full Sample | Follow-up Sample | DHS sample |
|----------------------------------------------------------------------|-------------|------------------|------------|
| <b>Male birth</b>                                                    | 0.54        | 0.54             | 0.51       |
| <b>Mother's age</b>                                                  |             |                  |            |
| <20                                                                  | 0.14        | 0.13             | 0.09       |
| 20-24                                                                | 0.45        | 0.45             | 0.37       |
| 25-29                                                                | 0.28        | 0.29             | 0.30       |
| ≥30                                                                  | 0.13        | 0.12             | 0.24       |
| <b>Mother's education</b>                                            |             |                  |            |
| Secondary or higher                                                  | 0.81        | 0.82             | 0.48       |
| Primary                                                              | 0.10        | 0.09             | 0.20       |
| No schooling                                                         | 0.09        | 0.09             | 0.32       |
| <b>Parity</b>                                                        |             |                  |            |
| 1                                                                    | 0.58        | 0.55             | 0.24       |
| 2                                                                    | 0.32        | 0.34             | 0.32       |
| 3&+                                                                  | 0.10        | 0.11             | 0.45       |
| <b>Ethnicity</b>                                                     |             |                  |            |
| Janajaati                                                            | 0.38        | 0.35             |            |
| Chhetri                                                              | 0.14        | 0.14             |            |
| Hill Brahmin                                                         | 0.22        | 0.23             |            |
| Madhesi                                                              | 0.07        | 0.07             |            |
| Dalit                                                                | 0.15        | 0.15             |            |
| Muslim                                                               | 0.03        | 0.03             |            |
| Others                                                               | 0.02        | 0.02             |            |
| <b>Region</b>                                                        |             |                  |            |
| Terai                                                                | 0.71        | 0.76             |            |
| Hill                                                                 | 0.28        | 0.24             |            |
| Mountain                                                             | 0.01        | 0.00             |            |
| <b>Number of induced abortions</b>                                   |             |                  |            |
| 0                                                                    | 0.96        | 0.96             |            |
| 1                                                                    | 0.04        | 0.04             |            |
| 2+                                                                   | 0.01        | 0.01             |            |
| <b>Conducted ultrasound during antenatal period of current birth</b> |             | 0.93             |            |
| <b>Knew sex of current child</b>                                     |             | 0.13             |            |
| N                                                                    | 75,428      | 14,015           | 4,047      |

# BMJ Open

## Determinants of imbalanced sex ratio at birth in Nepal: evidence from secondary analysis of a large hospital-based study, and a nationally representative survey data

|                                 |                                                                                                                                                                                                                                                                                                                                                                                                                                                                  |
|---------------------------------|------------------------------------------------------------------------------------------------------------------------------------------------------------------------------------------------------------------------------------------------------------------------------------------------------------------------------------------------------------------------------------------------------------------------------------------------------------------|
| Journal:                        | <i>BMJ Open</i>                                                                                                                                                                                                                                                                                                                                                                                                                                                  |
| Manuscript ID                   | bmjopen-2018-023021.R1                                                                                                                                                                                                                                                                                                                                                                                                                                           |
| Article Type:                   | Research                                                                                                                                                                                                                                                                                                                                                                                                                                                         |
| Date Submitted by the Author:   | 20-Sep-2018                                                                                                                                                                                                                                                                                                                                                                                                                                                      |
| Complete List of Authors:       | Pradhan, Elina; The World Bank Group, Pearson, Erin; IPAS; Johns Hopkins University Bloomberg School of Public Health<br>Puri, Mahesh; Center for Research on Environment, Population and Health Activities,<br>Maharjan, Manju; Center for Research on Environment, Population and Health Activities<br>Maharjan, Dev; Center for Research on Environment, Population and Health Activities<br>Shah, Iqbal; Harvard University T H Chan School of Public Health |
| <b>Primary Subject Heading</b>: | Global health                                                                                                                                                                                                                                                                                                                                                                                                                                                    |
| Secondary Subject Heading:      | Health policy, Global health                                                                                                                                                                                                                                                                                                                                                                                                                                     |
| Keywords:                       | PUBLIC HEALTH, REPRODUCTIVE MEDICINE, Health policy < HEALTH SERVICES ADMINISTRATION & MANAGEMENT                                                                                                                                                                                                                                                                                                                                                                |
|                                 |                                                                                                                                                                                                                                                                                                                                                                                                                                                                  |

SCHOLARONE™  
Manuscripts

# Determinants of imbalanced sex ratio at birth in Nepal: evidence from secondary analysis of a large hospital-based study, and a nationally representative survey data

Elina Pradhan<sup>1</sup>, Erin Pearson<sup>2</sup>, Mahesh Puri<sup>3</sup>, Manju Maharjan<sup>2</sup>, Dev Maharjan<sup>3</sup>, and Iqbal Shah<sup>4</sup>

<sup>1</sup>The World Bank Group, Washington, D.C.

<sup>2</sup>Ipas, Chapel Hill, NC, USA

<sup>3</sup>Center for Research on Environment, Health and Population Activities (CREHPA), Kathmandu, Nepal.

<sup>4</sup>Harvard T.H. Chan School of Public Health, Boston, MA

Corresponding Author: Elina Pradhan. (T) +1 617 823 8364 (E) [epadhan@mail.harvard.edu](mailto:epadhan@mail.harvard.edu)

Word Count: 4,528

## ABSTRACT

---

**Objectives:** To quantify sex ratio at births (SRB) in hospital deliveries in Nepal, and understand the socio-demographic correlates of skewed SRB. Skewed SRBs in hospitals could be explained by sex selective abortion, and/or by decision to have a son delivered in a hospital—increased in-utero investments for male fetus. We use data on ultrasound use to quantify links between prenatal knowledge of sex, parity and skewed SRBs.

**Design:** Secondary analysis of (1) de-identified data from a randomized controlled trial, and (2) 2011 Nepal Demographic and Health Survey (NDHS)

**Setting:** Nepal

**Participants:** (1) 75,428 women who gave birth in study hospitals, (2) NDHS: 12,674 women aged 15-49

**Outcome measures:** SRB, and conditional SRB of a second child given first born male or female were calculated.

**Results:** Using data from 75,428 women who gave birth in six tertiary hospitals in Nepal between September 2015 and March 2017, we report skewed SRBs in these hospitals, with some hospitals registering deliveries of 121 male births per 100 female births. We find that a nationally representative survey (2011 NDHS) reveals no difference in the number of hospital delivery of male and female babies. Additionally, we find that: (1) estimated SRB of second-order births conditional on the first being a girl is significantly higher than the biological SRB in our study and (2) multiparous women are more likely to have prenatal knowledge of the sex of their fetus and to have male births than primiparous women with the differences increasing with increasing levels of education.

**Conclusions:** Our analysis supports sex-selective abortion as the dominant cause of skewed SRBs in study hospitals. Comprehensive national policies that not only plan and enforce regulations against gender-biased abortions, but also ameliorate the marginalized status of women in Nepal are urgently required to change this alarming manifestation of son preference.

**Key words:** Sex ratio at birth, son preference, hospital deliveries, abortions, Nepal.

**Strengths and limitations of the study:**

- This is the first paper that shows highly skewed sex ratios from hospital deliveries in Nepal, and moreover, explicitly quantifies associations between ultrasound access and skewed SRBs.
- A strength of the study is that the analysis presented is based on a large sample—the primary sample is about 20% of all births in Nepal that happened during the study period.
- On the other hand, a limitation could be that this primary sample is not representative at the population level as it is derived from a hospital-based study.
- The study adjusts for potential socioeconomic and time-varying confounders, and presents SRBs adjusted for age, ethnicity, region, hospital fixed effects and month fixed effects.
- Another potential limitation is that women’s report of abortion history, which is a mediating variable reported, could suffer from reporting bias.

## I BACKGROUND

---

Sex ratios at birth (SRB), i.e., number of male births per 100 female births, have long been shown to be skewed in China, South Korea, some states of India and in some other East and South Asian, and North African countries, but evidence suggests that since the 1990s, skewed sex ratios are emerging in other Asian countries such as Pakistan and Vietnam [1,2]. The biologically normal sex ratio at birth ranges from 102 to 107 males per 100 females with 105 as the most common figure [3,4], but in India the national SRB is 109 compared to 120 in China [1], indicating that significantly more boys are being born than girls in these two countries, especially in China. As technology such as ultrasound has become more widely available in Asia, sex ratios have become more skewed [1,5,6]. When societies with strong son preference transition to low fertility, the desire to have male offspring becomes more acute and access to the technology can facilitate its realization. Couples may use ultrasound and other prenatal diagnostic tests for sex-selective abortion, though only about 11-27% of all ultrasound users across States in India were using ultrasound for sex-selective abortion between 1998-1999 when ultrasound was first becoming more widely available [5]. Given the trajectory of increasing sex ratios over time in Asia, it is possible that the ultrasound misuse for sex-selective abortion has increased as well as social pressure for sons has intensified with shrinking family sizes. Bhat and Zavier (2007) found that wealthier, more educated women in India had greater access to technology such as ultrasound, but ultrasound misuse for sex-selective abortion was more highly associated with region and sex composition of children already born [5,7]. Another study examining birth patterns of Indian migrants to Canada also found skewed sex ratio of higher parity births if the mothers only had girls, and furthermore, the skewed SRBs were associated with history of induced abortions [8].

In Nepal, son preference has been documented, but it has primarily manifested in women's contraceptive use and preferential care for male children, including more and higher quality food and better medical care, consistent with the 'femineglect' in health and education seen elsewhere in Asia [1,9,10]. As a result, older studies demonstrated higher under-five female compared to male mortality in Nepal due to preferential treatment and medical care for sons, but did not demonstrate skewed sex ratios at birth [1,9]. More recent studies have demonstrated that

1  
2  
3 conditional sex ratios, the sex ratio for second-born child when the first-born child was female,  
4 became skewed after abortion law was liberalized in 2002 [11]. Though sex-determination tests  
5 and sex-selective abortion are illegal in Nepal, punishable by imprisonment from 3 to 6 months  
6 [12,13], evidence suggests that it does occur [11,14]. Abortion providers report difficulty  
7 ascertaining whether families are seeking abortion for sex-selection purposes, and fear that  
8 women will resort to unsafe abortion if they are under pressure to bear sons but unable to access  
9 safe abortion services [14]. A comparison of two districts in Nepal found that many conditions  
10 led to higher SRB in one district compared to the other, including greater access to ultrasound  
11 due to more facilities offering diagnostic services and greater purchasing power, less  
12 enforcement of the law barring sex-selective abortion, desire for fewer children, and fewer  
13 community-based programs on gender equity [12].

14  
15 This is the first paper that shows highly skewed sex ratios from facility births in Nepal, and  
16 explicitly quantifies associations between ultrasound access and skewed SRBs. Women  
17 attending the facilities in the study generally have access to high quality care, including access to  
18 ultrasound technology, which is available in most study hospitals. Ultrasound may act on SRBs  
19 in these hospitals through two pathways: 1) sex-selective abortion, or 2) increased investment in  
20 delivery care for male babies. The present study explores potential pathways leading to skewed  
21 sex ratios in Nepal's largest hospitals by comparing estimates from the hospital-based sample  
22 with high access to ultrasound services to population-based estimates from Nepal's 2011  
23 Demographic and Health Survey [15]. The main objective is, therefore, to examine if skewed sex  
24 ratio at birth prevail on hospital deliveries compared to all births in a nationally representative  
25 household survey and the primary pathways leading to such outcome.

## 26 27 28 29 30 31 32 33 34 35 36 37 38 39 40 41 42 43 44 **II DATA AND METHODS**

---

### 45 46 47 **II.A STUDY DESIGN**

48  
49  
50 We assess SRB by geographic divisions and socio-demographic background characteristics of  
51 women using data from a multi-site facility-based survey of postpartum women in six of the  
52 largest hospitals in Nepal and from a population-based nationally representative survey (NDHS).  
53  
54  
55

## II.B DATA

The 2011 NDHS included 12,674 ever-married women aged 15-49, and the sample for the analysis included 4,047 births in the five years preceding the survey. The longitudinal data come from a hospital-based survey conducted as part of an evaluation of postpartum contraceptive services in six hospitals in Nepal. The six hospital sites were: Bharatpur Regional Hospital, B.P. Koirala Institute of Health Sciences (BPKIHS), Koshi Zonal Hospital, Lumbini Zonal Hospital, Western Regional Hospital and Bheri Zonal hospital. These sites span all the way from mid-western development zone to the eastern development zone; two hospitals are in the hilly region and four in the Terai. There are also some differences in the ethnic groups served by these hospitals (Appendix Figure 1)—27% of women who gave birth in Koshi Zonal hospital are so called “untouchables” (*Dalits*) versus only 9% in BPKIHS; 48% of women served by BPKIHS are indigenous group (*Janajaatis*) versus 25% in Bheri Zonal.

Women were enrolled in the study over a period of 18 months and completed a short questionnaire after delivery, before they are discharged from the hospital. A sample of those enrolled in the study were also approached for follow-up questionnaires at 9 months and 18 months postpartum. Inclusion criteria are that women have had a live birth, delivered in one of the six study hospitals, and reside in Nepal. Detailed study protocol has been published [16].

Out of a total of 75,897 women eligible for the study in the enrollment period (September 2015-March 2017), 75,587 (99.6%) consented to be interviewed, and interviews were conducted prior to discharge from hospital after delivery. The full sample used in this study constitutes of 75,428 women who consented to answering questions pertaining to variables analyzed in this paper.

The 9-month survey captures information not available in the 2011 NDHS, including a detailed assessment of ultrasound use during the recent pregnancy and previous pregnancies. The 9-month survey also captures the sex composition of all children born, and conditional sex ratios for second-born child given the sex of the first-born child will be calculated and compared to our estimates from the 2011 NDHS. This nine-month follow-up sample includes 14,015 women, with follow-up rate of 57.4%.



## II.C METHODS

Sex ratios were calculated for all births by dividing the total number of boys born by the total number of girls born, and multiplying by 100. Conditional sex ratios were calculated for second order births. Conditional sex ratios assess the ratio of second order boys to second order girls given the sex of the first child. Conditional sex ratios are often used to provide evidence for sex-selective abortion as women who want or are pressured to have a son are likely to take action at parity two, especially in the context of shrinking family size [11,17,18]. A sex ratio or conditional sex ratio of greater than 100 indicates more boys born compared to girls, and a sex ratio of less than 100 indicates more girls born compared to boys, while the biological ratio is estimated at 105 male-to-female births. The claim of skewed sex ratio at birth is made when the SRB calculated is statistically different from the biological SRB.

Linear regression models with hospital and month fixed effects are used to estimate the association between women's socio-demographic characteristics and male birth. The hospital and month fixed effects control for any hospital-specific or time-specific changes to the outcomes unrelated to the intervention, including any potential impact of the April 2015 earthquakes in Nepal [19]. Equation (1) below represents the multivariate model, where we interact women's education and parity to understand any multiplier effects of these two variables on male preference for woman  $i$ , hospital  $h$  and month  $t$ . We also control for region, ethnicity, woman's age, abortion history ( $X_i$ ), hospital fixed effects and month fixed effects.

$$\text{male birth}_{iht} = \alpha + \beta \text{schooling}_i + \psi \text{Parity}_i + \omega \text{schooling}_i * \text{Parity}_i + \gamma X_i + \sum_{h=1}^5 \delta_h H_h + \sum_{t=1}^{11} \tau_t T_t + \epsilon_{iht} \quad (1)$$

Outcomes for women who visit the same hospitals are likely to be correlated with each other. For example, social norms about family size and son preference could be localized in a geographic area. Hence, inference needs to be corrected for this potential correlation in each hospital cluster. Since we only have six hospitals or six clusters in our study, the standard cluster robust variance estimator can over-reject the null hypothesis [20]. We use the wild cluster bootstrap method with six-point bootstrap weight distribution to estimate the statistical significance of the effect size for all regression models [21–23].

We use questions asked in our nine-month follow-up on a subset of women randomly selected (among women who lived within 24 hours of travel time from the hospital) at the time of enrollment to understand any links between ultrasound prevalence, knowing the sex of the child before birth and male child born at the study hospital. Similar to model (1), equations (2) and (3) below are the models we use to understand if any of women's socio-demographic characteristics are linked with ultrasound performed during antenatal period of the current birth, and if the mother reports knowledge of sex of the child before birth.

$$ultrasound_i = \alpha + \beta schooling_i + \psi Parity_i + \omega schooling_i * Parity_i + \gamma X_i \sum_{h=1}^5 \delta_h H_h + \sum_{t=1}^{11} \tau_t T_t + \epsilon_{iht} \quad \text{--- (2)}$$

$$know\_sex\_before\_birth_i = \alpha + \beta schooling_i + \psi Parity_i + \omega schooling_i * Parity_i + \gamma X_i \sum_{h=1}^5 \delta_h H_h + \sum_{t=1}^{11} \tau_t T_t + \epsilon_{iht} \quad \text{--- (3)}$$

We then estimate sex ratio at births across mothers' education group, parity and prenatal knowledge of sex, followed by a descriptive picture of conditional SRBs in our study sample, and the NDHS sample.

Finally, we perform stepwise linear regression using NDHS data to understand whether boys born in the last five years were more likely to be delivered in hospitals, adjusting for women's socio-demographic characteristics (equation (4)). This stepwise method adds each of the potentially relevant socioeconomic variables such as woman's education, parity, age and household wealth tertile ( $X_i$ ) to the model in addition to male child as explanatory variables, and could allow us to identify any models where male births were significantly related to hospital-based deliveries. We could potentially assert the dominance of female foeticide as the primary reason behind skewed SRBs if we did not find a significant relationship between hospital-based deliveries and male births in these models.

$$hospital - based\ delivery_i = \alpha + \beta male\_child_i + \gamma X_i + \epsilon_i \quad \text{--- (4)}$$

### Patient and Public Involvement:

The patients and the public were not directly involved in the development of research question, outcome measures, or the design of the study. Respondents were women who delivered in the study hospitals and provided consent to participate in the study. The research question was informed by the available data on the status of women in the country and the region, and the results are being incorporated in an early preparation state of Nepal's national strategy to prevent gender-biased sex selection.

## III RESULTS

---

Figure 1 shows the sex ratio at birth at the six study hospitals. The biological ratio is 105, and according to Nepal census 2011, the sex ratio at birth for Nepal is 107 [24]. The ratio of births at the study hospitals is substantially higher than either the biological ratio or the national average. We observe the highest SRB at Western Regional and Bharatpur hospital, with the ratio of 121 and 120 male births per 100 female births, respectively. The sex ratio at birth in our overall sample is also significantly higher than the national average of 107—we find that 117 male births took place in the study hospitals for every 100 female births.

Table 1, data column 1 presents association between socio-demographic factors with male births in our study hospitals based on model 1. The descriptive statistics for the variables used in this regression are tabulated in Appendix Table 1. We find that higher order births are more likely to be male, and a mother with secondary schooling having her third (or higher order) child is 18 percentage points more likely to deliver a male child compared to a woman who has just given birth to her first child. Chhetri women are more likely to have male births compared to Janajaatis. There is significant interaction effect of parity and mother's education when predicting male birth. Furthermore, male birth is not associated with the mother's history of induced abortion.

**Table 1: Association of socio-demographic factors with male births, ultrasound during ANC and knowledge of sex of current child before birth in study hospitals**

|                                                      | Male Birth |                   | Ultrasound during ANC |                    | Knew the sex of the current child before birth |                      |
|------------------------------------------------------|------------|-------------------|-----------------------|--------------------|------------------------------------------------|----------------------|
|                                                      | Est.       | 95% CI            | Est.                  | 95% CI             | Est.                                           | 95% CI               |
| <b>Mother's Age (Ref: &lt;20)</b>                    |            |                   |                       |                    |                                                |                      |
| 20-24                                                | 0.006      | [-0.002 - 0.014]  | 0.014**               | [0.000 - 0.028]    | -0.009                                         | [-0.026 - 0.008]     |
| 25-29                                                | 0.010      | [-0.009 - 0.025]  | 0.030***              | [0.015 - 0.044]    | 0.002                                          | [-0.017 - 0.021]     |
| ≥30                                                  | 0.014**    | [0.007 - 0.032]   | 0.043***              | [0.025 - 0.061]    | 0.040***                                       | [0.014 - 0.067]      |
| <b>Mother's Education (Ref: Secondary or higher)</b> |            |                   |                       |                    |                                                |                      |
| Primary                                              | 0.009      | [-0.006 - 0.035]  | -0.052***             | [-0.079 - -0.024]  | 0.032**                                        | [0.001 - 0.063]      |
| No schooling                                         | 0.025      | [-0.012 - 0.058]  | -0.130***             | [-0.169 - -0.089]  | 0.049***                                       | [0.015 - 0.083]      |
| <b>Parity (Ref: 1)</b>                               |            |                   |                       |                    |                                                |                      |
| 2                                                    | 0.049***   | [0.014 - 0.078]   | -0.020***             | [-0.029 - -0.011]  | 0.056***                                       | [0.041 - 0.072]      |
| ≥3                                                   | 0.178***   | [0.136 - 0.210]   | -0.028***             | [-0.045 - -0.011]  | 0.252***                                       | [0.217 - 0.289]      |
| <b>Mother's Education*Parity</b>                     |            |                   |                       |                    |                                                |                      |
| Primary*2                                            | -0.038*    | [-0.090 - 0.000]  | 0.001                 | [-0.040 - 0.042]   | -0.070***                                      | [-0.112 - -0.026]    |
| Primary*≥3                                           | -0.113***  | [-0.151 - -0.054] | -0.006                | [-0.056 - 0.043]   | -0.131***                                      | [-0.204 - -0.058]    |
| No schooling*2                                       | -0.065**   | [-0.124 - -0.011] | 0.007                 | [-0.049 - 0.064]   | -0.109***                                      | [-0.153 - -0.064]    |
| No schooling*≥3                                      | -0.139***  | [-0.198 - -0.074] | -0.050*               | [-0.104 - 0.004]   | -0.219***                                      | [-0.278 - -0.159]    |
| <b>Ethnicity (Ref: Janajaati)</b>                    |            |                   |                       |                    |                                                |                      |
| Chhetri                                              | 0.013**    | [0.002 - 0.034]   | 0.028***              | [0.017 - 0.038]    | -0.0001                                        | [-0.018 - 0.018]     |
| Hill Brahmin                                         | 0.011      | [-0.002 - 0.025]  | 0.022***              | [0.014 - 0.030]    | 0.007                                          | [-0.008 - 0.022]     |
| Madhesi                                              | 0.005      | [-0.068 - 0.049]  | -0.024**              | [-0.047 - -0.001]  | -0.005                                         | [-0.027 - 0.018]     |
| Dalit                                                | -0.005     | [-0.018 - 0.009]  | -0.015**              | [-0.030 - -0.001]  | 0.002                                          | [-0.016 - 0.020]     |
| Muslim                                               | -0.028**   | [-0.068 - -0.007] | 0.014                 | [-0.021 - 0.049]   | -0.028*                                        | [-0.058 - 0.002]     |
| Others                                               | 0.025*     | [-0.003 - 0.049]  | 0.032**               | [0.003 - 0.060]    | 0.045*                                         | [-0.002 - 0.091]     |
| <b>Region (Ref: Terai)</b>                           |            |                   |                       |                    |                                                |                      |
| Hill                                                 | 0.003      | [-0.020 - 0.011]  | -0.006                | [-0.022 - 0.010]   | -0.016                                         | [-0.043 - 0.012]     |
| Mountain                                             | 0.003      | [-0.090 - 0.042]  | -0.295                | [-51.884 - 51.213] | -0.105                                         | [-102.651 - 103.068] |
| <b>Number of Abortions (Ref: 0)</b>                  |            |                   |                       |                    |                                                |                      |
| 1                                                    | 0.0003     | [-0.022 - 0.035]  | 0.019**               | [0.003 - 0.035]    | 0.0363**                                       | [0.002 - 0.070]      |
| 2+                                                   | 0.050      | [-0.006 - 0.100]  | 0.055***              | [0.024 - 0.084]    | 0.068                                          | [-0.031 - 0.164]     |
| <b>Constant</b>                                      | 0.518***   | [0.474 - 0.551]   | 0.951***              | [0.932 - 0.970]    | 0.245***                                       | [0.217 - 0.274]      |
| Observations                                         | 75,428     |                   | 14,015                |                    | 13,113                                         |                      |
| R-squared                                            | 0.009      |                   | 0.111                 |                    | 0.077                                          |                      |

Note: Difference from null tested using wild cluster bootstrap method.

All regression models adjusted for hospital and month fixed effects. \*\*\* p<0.01, \*\* p<0.05, \* p<0.1.

1  
2  
3 An estimate of interest is the sex ratio at birth for education and parity, adjusted for other  
4 covariates as shown in equation 1. Figure 2 shows the sex ratio at birth across women's  
5 education and parity predicted from this model. Predicted SRB for women with at least  
6 secondary schooling who are giving birth for the first time is 105 male births/ 100 female births.  
7  
8 However, this estimate skews drastically with increasing parity. SRB for women with at least  
9 secondary schooling with parity three or higher is estimated at 224 male births per 100 female  
10 births.  
11  
12  
13  
14  
15

16 As discussed previously, there could be two pathways through which deliveries at these large  
17 tertiary hospitals are skewed by sex. One could be sex-selective abortion, which will skew the  
18 ratio of male births to female births. The other is the selective investment pathway, where  
19 families upon prior knowledge of the sex of their fetus place higher value in the health and  
20 delivery of the male fetus than of the female, and hence selectively choose to travel to a hospital  
21 to deliver a male child. We now present analysis from the nine-month follow-up to illustrate  
22 correlates of access and use of ultrasound, and women's knowledge of the sex of the fetus prior  
23 to the birth.  
24  
25  
26  
27  
28  
29  
30

31 Column 3 in Table 1 presents correlates of ultrasound conducted during antenatal period of the  
32 current birth, controlling for hospital and month fixed effects. Older women are more likely to  
33 have ultrasound conducted during the antenatal period of their current child, and ultrasound  
34 prevalence is higher among educated women compared to women with no schooling. Compared  
35 to Janajaati ethnic group, Hill Brahmins and Chhetris are more, and Madhesis and Dalits are less  
36 likely to have conducted ultrasound. Women who report history of abortion are more likely to  
37 have conducted ultrasound for their current birth.  
38  
39  
40  
41  
42  
43

44 As discussed before, facilitating or conducting sex determination tests is illegal in Nepal.  
45 However, we find that 13% of the women in our follow-up sample report knowing the sex of  
46 their child before birth. Similar to correlates of male birth, women reporting knowledge of the  
47 sex of their fetus before birth is also correlated with women's education and parity with  
48 significant interactions between these covariates (Table 1, column 5). Along the education  
49 gradient, an estimated 35% of women with at least secondary schooling at parity three or more  
50 report knowledge of the sex of their child before birth as compared to 18% of women with no  
51  
52  
53  
54  
55

1  
2  
3 schooling at the same category of parity (Figure 3). Along the parity gradient, among women  
4 with at least secondary schooling, primiparous women are 25 percentage points less likely to  
5 report that they know the sex of their child before birth.  
6  
7

8  
9 The estimated sex ratios at birth are remarkably different across women who report knowledge  
10 of sex of the current child before birth. Figure 4 illustrates SRB for women across parity,  
11 education groups and knowledge of the sex of the fetus. Consistently across all categories, we  
12 find that women who report that they know the sex of the fetus are more likely to give birth to a  
13 male child than a female child. For example, women who reported knowledge of the sex of fetus,  
14 with parity three or higher who have at least secondary schooling had 6.4 times as many boys  
15 than girls.  
16  
17  
18  
19  
20  
21

22 To further understand the interaction between parity and education, we sub-select women having  
23 their second child, and estimate the conditional sex ratio at birth across women's educational  
24 groups differentiating between those who report having a living son from their first birth to those  
25 who do not (either the first-born was a daughter, or it was a son who has passed away) (Figure  
26 5). We find that the sex of the second birth is not significantly different from the biological SRB  
27 if women already have a living son, but women with any education tend to have a significantly  
28 higher number of sons in their second birth if they do not have a living son. Women with any  
29 schooling are estimated to have 1.7 times as many sons than daughters in our study hospital in  
30 their second birth if they do not have a living son.  
31  
32  
33  
34  
35  
36  
37  
38

39 The estimates observed in the analyses shown until now are based on surveys for which  
40 enrollment took place in study hospitals, and the sample only includes women who chose to give  
41 birth in those hospitals. In the analysis below, we compare our results on estimates of conditional  
42 sex ratio at birth from the hospital sample with the nationally representative 2011 NDHS data.  
43 First, we compare the sex ratio at birth of second order births for those without male siblings  
44 across study data and NDHS (Figure 6). Similar to the hospital sample estimates, we find that the  
45 NDHS estimates of sex ratio at birth of second order births conditional on not having a living  
46 male sibling is significantly higher than biological SRB, at 150 male births per 100 female births.  
47  
48  
49  
50  
51  
52  
53  
54  
55  
56  
57  
58  
59  
60

1  
2  
3 In Figure 7, we illustrate any differentials in sex ratio of all births versus second order births  
4 conditional on having an older sister, in analysis similar to Frost et al. (2013) using the nationally  
5 representative NDHS data. Compared to all births in the past three years, the sex ratio of second  
6 order births with an older girl sibling is higher by 13 points—the sex ratio at birth of second  
7 order births who do not have a living male sibling is 132. Mothers with at least secondary  
8 schooling are much more likely to bear a son in the second birth conditional on not having a  
9 living son—on average, women with at least secondary schooling have 107 boys to 100 girls, but  
10 if they have a girl as a first born or if their first-born son has passed away, they are 1.5 times  
11 more likely to have a son rather than a daughter for their second child. Differences in SRB across  
12 first birth and conditional second birth also hold across the wealth quintile-levels in the 2011  
13 NDHS, although the differences are not statistically significant likely because of small sample  
14 size of the conditional SRB estimates.  
15  
16  
17  
18  
19  
20  
21  
22  
23

24  
25 We tabulate the results of stepwise regression associating male babies and hospital-based  
26 delivery adjusting for mother's sociodemographic characteristics in Table 2. We find that boys  
27 are not more likely to be delivered in hospitals as compared to girls. As the corresponding data  
28 columns in Table 2 show, the link between hospital-based births and sex of the child is not  
29 significant across the different levels of stepwise regression.  
30  
31  
32  
33  
34  
35  
36  
37  
38  
39  
40  
41  
42  
43  
44  
45  
46  
47  
48  
49  
50  
51  
52  
53  
54  
55  
56  
57  
58  
59  
60

**Table 2: Association between hospital-based delivery and male births in NDHS, stepwise regression**

|                                                      | Dependent variable: Hospital-based delivery |                   |                   |                   |                   |                   |                   |
|------------------------------------------------------|---------------------------------------------|-------------------|-------------------|-------------------|-------------------|-------------------|-------------------|
|                                                      | (1)                                         | (2)               | (3)               | (4)               | (5)               | (6)               | (7)               |
| <b>Male child</b>                                    | 0.003                                       |                   | -0.005            | -0.025            | -0.023            | -0.022            | -0.014            |
|                                                      | [-0.025 - 0.030]                            |                   | [-0.031 - 0.021]  | [-0.077 - 0.026]  | [-0.074 - 0.027]  | [-0.072 - 0.028]  | [-0.063 - 0.034]  |
| <b>Mother's Education (Ref: Secondary or higher)</b> |                                             |                   |                   |                   |                   |                   |                   |
| Primary                                              |                                             | -0.231***         | -0.231***         | -0.256***         | -0.218***         | -0.200***         | -0.081**          |
|                                                      |                                             | [-0.282 - -0.180] | [-0.282 - -0.180] | [-0.322 - -0.191] | [-0.284 - -0.152] | [-0.266 - -0.133] | [-0.147 - -0.016] |
| No schooling                                         |                                             | -0.335***         | -0.335***         | -0.347***         | -0.253***         | -0.247***         | -0.101***         |
|                                                      |                                             | [-0.381 - -0.288] | [-0.382 - -0.288] | [-0.402 - -0.292] | [-0.310 - -0.196] | [-0.303 - -0.191] | [-0.156 - -0.045] |
| <b>Male child*Mother's education</b>                 |                                             |                   |                   |                   |                   |                   |                   |
| Male child, Primary                                  |                                             |                   |                   | 0.048             | 0.049             | 0.045             | 0.048             |
|                                                      |                                             |                   |                   | [-0.024 - 0.120]  | [-0.023 - 0.121]  | [-0.027 - 0.116]  | [-0.022 - 0.118]  |
| Male child, No schooling                             |                                             |                   |                   | 0.023             | 0.012             | 0.011             | 0.011             |
|                                                      |                                             |                   |                   | [-0.034 - 0.080]  | [-0.043 - 0.068]  | [-0.044 - 0.067]  | [-0.042 - 0.065]  |
| <b>Parity (Ref: 1)</b>                               |                                             |                   |                   |                   |                   |                   |                   |
| 2                                                    |                                             |                   |                   |                   | -0.096***         | -0.129***         | -0.121***         |
|                                                      |                                             |                   |                   |                   | [-0.143 - -0.050] | [-0.175 - -0.083] | [-0.163 - -0.079] |
| ≥3                                                   |                                             |                   |                   |                   | -0.210***         | -0.277***         | -0.227***         |
|                                                      |                                             |                   |                   |                   | [-0.253 - -0.167] | [-0.327 - -0.228] | [-0.276 - -0.178] |
| <b>Mother's Age (Ref: &lt;20)</b>                    |                                             |                   |                   |                   |                   |                   |                   |
| 20-24                                                |                                             |                   |                   |                   |                   | 0.078**           | 0.047             |
|                                                      |                                             |                   |                   |                   |                   | [0.016 - 0.140]   | [-0.011 - 0.106]  |
| 25-29                                                |                                             |                   |                   |                   |                   | 0.157***          | 0.100***          |
|                                                      |                                             |                   |                   |                   |                   | [0.089 - 0.225]   | [0.036 - 0.165]   |
| >=30                                                 |                                             |                   |                   |                   |                   | 0.151***          | 0.110***          |
|                                                      |                                             |                   |                   |                   |                   | [0.076 - 0.226]   | [0.040 - 0.181]   |
| <b>Household wealth tertile (Ref: Poor)</b>          |                                             |                   |                   |                   |                   |                   |                   |
| Middle                                               |                                             |                   |                   |                   |                   |                   | 0.104***          |
|                                                      |                                             |                   |                   |                   |                   |                   | [0.065 - 0.144]   |
| Rich                                                 |                                             |                   |                   |                   |                   |                   | 0.353***          |
|                                                      |                                             |                   |                   |                   |                   |                   | [0.299 - 0.407]   |
| Constant                                             | 0.281***                                    | 0.484***          | 0.487***          | 0.498***          | 0.573***          | 0.493***          | 0.258***          |
|                                                      | [0.248 - 0.313]                             | [0.441 - 0.528]   | [0.441 - 0.533]   | [0.447 - 0.549]   | [0.521 - 0.625]   | [0.423 - 0.564]   | [0.186 - 0.331]   |
| Observations                                         | 4,047                                       | 4,047             | 4,047             | 4,047             | 4,047             | 4,047             | 4,047             |
| R-squared                                            | 0.000                                       | 0.108             | 0.109             | 0.109             | 0.137             | 0.146             | 0.225             |

Note: Standard errors clustered at the primary sampling unit level.



## IV DISCUSSION

---

Our analysis shows evidence of skewed sex ratio of deliveries in six large public hospitals in Nepal. Consistent with the literature on determinants of son-preference and sex-selective abortion, we show that male birth in the study hospitals is correlated with higher parity births and higher education of mothers. Using the nationally representative NDHS, we also find that male babies are no more likely to be delivered in hospitals than female babies, adjusting for the mother's sociodemographic characteristics, which suggests sex-selective abortion as the primary reason behind skewed SRBs.

We find that more educated women, and women having higher parity births are more likely to use sex-determination tests for the child. Similar to Frost et al. (2013) [11], we show that the gender imbalance is higher in second order births compared to all births in our study sample, and these differences are larger in more educated women, and women from richer households. With increasing preference for smaller family size and persistent son preference, households face the pressure of balancing the sex of their children while having a small family size. Consistent with the literature from India discussed in the background section, women with more resources and more knowledge have greater access to ultrasound technologies, but the extent of use of these technologies for sex-selective abortion was dependent on sex composition of their children who were already born [5].

We did not find male birth to be significantly correlated with the mother's abortion history. This could be interpreted in two ways. If the abortion reporting is accurate, then the skewed sex ratio in the hospital births could be attributed to the additional investment pathway, which is that the knowledge of the sex of the fetus led to the family delivering the male fetus in the hospital. However, abortion is often underreported in which case male birth might be correlated with the true, but unknown, abortion history. In this case, the first pathway of female foeticide is a likely explanation for skewed SRB. Families and women who have undergone sex-selective abortion may be differentially more likely to report that they do not have a history of induced abortion, in which case the estimate of abortion history on male birth will be an underestimate.

1  
2  
3 A major limitation of this study is potential reporting bias on key mediating parameters. Women  
4 are likely to under-report experience of induced abortion which could be an important  
5 explanatory link in understanding the skewed SRBs. Furthermore, even though 13% of the  
6 women in the survey reported knowing the sex of the child despite sex-determination tests being  
7 illegal in Nepal, the women who were conscious of the illegal nature of the tests could have  
8 chosen to not report that they conducted in-utero sex-determination tests for their current birth.  
9 Hence, the knowledge of the sex of the current birth before delivery could also be underreported.

10  
11 Another potential limitation of the study is that there is considerable loss to follow up for the  
12 sample that the prenatal sex knowledge questions are derived from. However, comparison of the  
13 covariates between the full sample and the follow up sample (Appendix Table 1) shows that  
14 women in the two samples have about the same distribution of age, educational levels, parity,  
15 male births, and history of induced abortions.

16  
17 Our hospital-based study is focused on women who gave birth in health facilities in Nepal, and  
18 this sample is selective, and might not be representative of all births nationally, as 57% of all live  
19 births in five years preceding the 2016 DHS took place in a health facility. Additionally, 81% of  
20 women in our hospital-based sample had at least secondary schooling, whereas only 48% of the  
21 women in the 2011 DHS sample had at least secondary schooling—the women in our sample are  
22 more educated, younger and have fewer children than the women in the nationally representative  
23 NDHS. This phenomenon of skewed SRB could be localized to younger and more educated  
24 mothers, which would be analogous to findings from other countries where skewed SRBs are  
25 reported [1,3,5].

26  
27 Albeit from a selected sample, we contribute to the literature by reporting on skewed sex ratio at  
28 birth in Nepal across socio-demographic characteristics, using a large sample which accounts for  
29 about 20% of all births in Nepal during the study period. We find that women's education, which  
30 is a proxy variable for measuring access to health services (mainly knowledge), and parity are  
31 important correlates of male births and reports of sex-determination tests. Although comprising  
32 of only hospital-births, this striking phenomenon covers 20% of all births in Nepal during the  
33 year and a half of the survey period—the large sample size also adds to the significance and  
34 validity of our results-- Comparing conditional SRBs in nationally representative NDHS and in

1  
2  
3 the hospital sample we find that SRB for all births (not only hospital births) was significantly  
4 higher for second order births if the first order birth was a girl, which suggests the sex-selective  
5 abortion pathway. Additional findings on (1) women reporting knowledge of the sex of the fetus  
6 and significantly differential SRBs across the socio-economic groups, and (2) no correlation of  
7 male births with facility deliveries using the nationally representative sample further support the  
8 sex-selection abortion pathway.  
9  
10  
11  
12

13  
14 The Trivers-Willard effect would be consistent with more educated and wealthy women having  
15 more sons as they are generally in better health condition [21]. However, Figure 5, which  
16 illustrates SRBs for second order births differentially among those with male siblings and no  
17 male siblings suggest that sociological son preference is still overwhelmingly the primary reason  
18 for skewed sex ratio at births among educated women—the conditional SRB of second order  
19 births with male siblings among women with at least secondary schooling is 105, as compared to  
20 176 for those without any male siblings.  
21  
22  
23  
24  
25  
26

27 Nepal has seen a rapid decline in actual and desired fertility rates over the last forty years.  
28 However, the reduction in desired fertility exists in a society with persistent preferences for a  
29 son, because of cultural and religious norms, and economic rationale. Aside from the religious  
30 norms such as sons being necessary to perform death rituals in Hinduism, parents have an  
31 economic incentive to have sons in an environment where (1) strong filial (social and financial)  
32 ties exist between parents and children, (2) women are not able to realize their full economic  
33 earning potential, and (3) daughters are considered to “belong” to another family after marriage.  
34 The marginalized status of women, coupled with increasing access to sex-selection technology  
35 and lack or weak enforcement of the law is further skewing sex ratio at births in Nepal.  
36  
37  
38  
39  
40  
41  
42  
43

44 Imbalanced sex ratios at birth (SRB) are not immutable as evidenced from South Korea. SRBs  
45 in South Korea rose from 109 in 1985 to 115 in 1994, but then declined reaching 105 in 2016  
46 [25]. Most remarkable are the 2016 SRB figures by birth order –104 for the first order births, 105  
47 for the second, and 107 for the (fewer) third or higher order births. This transition to balanced  
48 SRB has been achieved by a combination of factors resulting in raising the status and  
49 empowerment of women [26]. Increased opportunities for higher education and better  
50 employment contributed to women’s autonomy coupled with laws and policies addressing  
51  
52  
53  
54  
55

women's rights. The law recognizing women's inheritance and other rights within their birth family following marriage contributed to redressing the traditional gender imbalance that existed in Korea. Media campaigns such as "Love your daughters" and other measures such as strict enforcement of laws prohibiting the misuse of technology for sex determination, increased exposure to mass media, weakening of traditional patrilineal norms with increasing urbanization and industrialization and expansion of nuclear families all contributed to bringing down SRB to the normal biological level in the country [27–29]. As exemplified by the South Korean experience, it is possible to bring down the skewed SRB to the normal level by systematic and multi-pronged efforts.

Bongaarts and Guilмото (2015) predict that the preference for sons and gender discriminations faced by the female sex from before birth that continues over a lifetime has manifested as three million excess female deaths every year globally, or 150 million missing women by 2035 [30]. Our findings highlight the marginalized status of women in Nepal, and stress the urgent need for research and implementation of policies that reduce son preference and ultimately, skewed sex ratios. National strategies to prevent misuse of ultrasound services and gender-biased sex selection that do not hinder women's access to safe abortion services are needed. Most importantly, comprehensive interventions with a mix of laws, policies and advocacy campaigns that aim to improve the status of women and eliminate gender-based discrimination are needed to achieve a balanced sex ratio at birth and subsequent survival and quality of life.

**Figure 1: Sex ratio at birth at study hospitals**

**Figure 2: Predicted sex ratio at birth across women's education and parity**

**Figure 3: Predicted knowledge of sex of current child before birth across women's education and parity**

**Figure 4: Sex ratio at birth across women's education, parity and knowledge of sex of child before birth**

**Figure 5: Sex ratio at birth of second birth order across women's education and living male child.**

**Figure 6: Conditional sex ratio at birth of second order birth with no male sibling, comparison between hospital sample (study) and Nepal DHS across education groups**

**Figure 7: Sex ratio at birth across socio-demographic characteristics between all births in the last three years, and second order births conditional on having an older sister**

1  
2  
3  
4  
5  
6  
7  
8  
9  
10  
11  
12  
13  
14  
15  
16  
17  
18  
19  
20  
21  
22  
23  
24  
25  
26  
27  
28  
29  
30  
31  
32  
33  
34  
35  
36  
37  
38  
39  
40  
41  
42  
43  
44  
45  
46  
47  
48  
49  
50  
51  
52  
53  
54  
55  
56  
57  
58  
59  
60

For peer review only

1  
2  
3 **Acknowledgments:** The analysis in this study is made possible with the time and effort by the  
4 women in the PPIUD project who participated in the research study about a day after giving  
5 birth. The authors would like to thank these women, and the thousands of women who took their  
6 time in participating in the 2011 Nepal DHS. We would also like to acknowledge the valiant  
7 effort from thousands of enumerators and program staff in the DHS and PPIUD project.  
8  
9

10 We are grateful to Nepal Society of Obstetricians and Gynaecologists (NESOG) and  
11 International Federation of Obstetricians and Gynaecologists (FIGO) for implementing the  
12 intervention in the parent study that the paper is based on.  
13  
14

15 **Contributorship statement:** EP and ErP analysed the data and wrote the first draft of the  
16 manuscript. MP serves as principal investigator of the parent study. EP, ErP, MP, IS, MM and  
17 DM contributed to the development or revision of study instrument, or reviewed the manuscript  
18 and provided scientific oversight. EP, ErP, MP and IS read, edited and approved the final  
19 manuscript.  
20  
21  
22

23 **Competing Interests:** None  
24  
25

26 **Funding:** This study was funded by a grant to the Harvard T. H. Chan School of Public Health  
27 from the Susan Thompson Buffett Foundation. The funding source had no role in the design,  
28 implementation, data collection, analysis and interpretation of results or in dissemination of  
29 findings.  
30  
31

32 **Ethics approval and consent to participate:** The study was approved by the Nepal Health  
33 Research Council, Nepal (#51/2015).  
34  
35

36 **Availability of data and materials:** The Demographic and health survey data is available from  
37 [the DHS program website](#). A sample of data from the parent longitudinal study will be made  
38 available for replication study upon request. The entire data set will also be made public at the  
39 end of the study. All data requests should be sent to the Program Coordinator Ms. Laura  
40 Campagna at [lcampagn@hsph.harvard.edu](mailto:lcampagn@hsph.harvard.edu).  
41  
42  
43  
44  
45  
46  
47  
48  
49

## 50 REFERENCES

---

- 51  
52 1 Guilmoto CZ. The Sex Ratio Transition in Asia. *Popul Dev Rev* 2009;**35**:519–49.  
53 doi:10.1111/j.1728-4457.2009.00295.x  
54  
55

- 1
- 2
- 3 2 Bélanger D, Thi Hai Oanh K, Jianye L, *et al.* Les rapports de masculinité à la naissance
- 4 augmentent-ils au Vietnam? *Population* 2003;**58**:255. doi:10.3917/popu.302.0255
- 5
- 6 3 Parazzini F, La Vecchia C, Levi F, *et al.* Trends in male:female ratio among newborn infants
- 7 in 29 countries from five continents. *Hum Reprod* 1998;**13**:1394–6.
- 8 doi:10.1093/humrep/13.5.1394
- 9
- 10 4 World Bank. World Development Indicators 2017. Washington, D.C.: : World Bank 2017.
- 11
- 12
- 13 5 Attane I (ed ), Demography C for IC in NR in, Eng P (France), *et al.* Watering the
- 14 neighbour's garden: the growing demographic female deficit in Asia. Published Online First:
- 15 2007.<http://agris.fao.org/agris-search/search.do?recordID=XF2015028131> (accessed 28 Sep
- 16 2016).
- 17
- 18 6 Gupta MD, Chung W, Shuzhuo L. Evidence for an Incipient Decline in Numbers of Missing
- 19 Girls in China and India. *Popul Dev Rev* 2009;**35**:401–16. doi:10.1111/j.1728-
- 20 4457.2009.00285.x
- 21
- 22
- 23 7 Bhat PNM, Zavier AJF. Factors Influencing the Use of Prenatal Diagnostic Techniques and
- 24 the Sex Ratio at Birth in India. *Econ Polit Wkly* 2007;**42**:2292–303.
- 25
- 26 8 Urquia ML, Moineddin R, Jha P, *et al.* Sex ratios at birth after induced abortion. *CMAJ Can*
- 27 *Med Assoc J* 2016;**188**:E181–90. doi:10.1503/cmaj.151074
- 28
- 29 9 Leone T, Matthews Z, Zuanna GD. Impact and Determinants of Sex Preference in Nepal. *Int*
- 30 *Fam Plan Perspect* 2003;**29**:69–75. doi:10.2307/3181060
- 31
- 32
- 33 10 Grech V. Gendercide and femineglect. *Early Hum Dev* 2015;**91**:851–4.
- 34 doi:10.1016/j.earlhumdev.2015.10.014
- 35
- 36 11 Frost MD, Puri M, Hinde PRA. Falling sex ratios and emerging evidence of sex-selective
- 37 abortion in Nepal: evidence from nationally representative survey data. *BMJ Open*
- 38 2013;**3**:e002612. doi:10.1136/bmjopen-2013-002612
- 39
- 40 12 Puri M, Tamang A. *Understanding factors influencing adverse sex ratios at birth and*
- 41 *exploring what works to achieve balance: The situation in selected districts of Nepal.*
- 42 Kathmandu, Nepal: : CREHPA 2015.
- 43
- 44 13 Government of Nepal. National Safe Abortion Service Policy, 2060 B.S.
- 45
- 46 14 Lamichhane P, Harken T, Puri M, *et al.* Sex-Selective Abortion in Nepal: A Qualitative
- 47 Study of Health Workers' Perspectives. *Womens Health Issues* 2011;**21**:S37–41.
- 48 doi:10.1016/j.whi.2011.02.001
- 49
- 50 15 Ministry of Health and Population (MOHP) [Nepal], New ERA, and Macro International
- 51 Inc. Nepal Demographic and Health Survey 2011. Kathmandu, Nepal: : Ministry of Health
- 52 and Population, New ERA, and Macro International Inc. 2012.
- 53
- 54
- 55

- 1  
2  
3 16 Canning D, Shah IH, Pearson E, *et al.* Institutionalizing postpartum intrauterine device  
4 (IUD) services in Sri Lanka, Tanzania, and Nepal: study protocol for a cluster-randomized  
5 stepped-wedge trial. *BMC Pregnancy Childbirth* 2016;**16**:362. doi:10.1186/s12884-016-  
6 1160-0  
7  
8  
9 17 Jha P, Kumar R, Vasa P, *et al.* Low male-to-female sex ratio of children born in India:  
10 national survey of 1·1 million households. *The Lancet* 2006;**367**:211–8. doi:10.1016/S0140-  
11 6736(06)67930-0  
12  
13 18 Jha P, Kesler MA, Kumar R, *et al.* Trends in selective abortions of girls in India: analysis of  
14 nationally representative birth histories from 1990 to 2005 and census data from 1991 to  
15 2011. *The Lancet* 2011;**377**:1921–8. doi:10.1016/S0140-6736(11)60649-1  
16  
17 19 Fukuda M, Fukuda K, Mason S, *et al.* The sex ratio at birth after recent major earthquakes in  
18 Japan. *Early Hum Dev* 2018;**123**:30–1. doi:10.1016/j.earlhumdev.2018.06.002  
19  
20 20 Bertrand M, Duflo E, Mullainathan S. How Much Should We Trust Differences-In-  
21 Differences Estimates? *Q J Econ* 2004;**119**:249–75. doi:10.1162/003355304772839588  
22  
23 21 Cameron AC, Gelbach JB, Miller DL. Bootstrap-Based Improvements for Inference with  
24 Clustered Errors. *Rev Econ Stat* 2008;**90**:414–27. doi:10.1162/rest.90.3.414  
25  
26 22 Webb MD. Reworking Wild Bootstrap Based Inference for Clustered Errors. Queen's  
27 University, Department of Economics 2014. <https://ideas.repec.org/p/qed/wpaper/1315.html>  
28 (accessed 16 Dec 2016).  
29  
30 23 Roodman D. *BOOTTEST: Stata module to provide fast execution of the wild bootstrap with*  
31 *null imposed.* Boston College Department of Economics 2016.  
32 <https://ideas.repec.org/c/boc/bocode/s458121.html> (accessed 16 Dec 2016).  
33  
34 24 Central Bureau of Statistics. *Population Monograph of Nepal.* Kathmandu, Nepal: : National  
35 Planning Commission Secretariat, Government of Nepal 2014.  
36  
37 25 Statistics Korea, Republic of Korea. Korean statistical information service.  
38 <http://kosis.kr/eng/> (accessed 12 Jan 2018).  
39  
40 26 Chung W, Gupta MD. The Decline of Son Preference in South Korea: The Roles of  
41 Development and Public Policy. *Popul Dev Rev* 2007;**33**:757–83. doi:10.1111/j.1728-  
42 4457.2007.00196.x  
43  
44 27 Park CB, Cho N-H. Consequences of Son Preference in a Low-Fertility Society: Imbalance  
45 of the Sex Ratio at Birth in Korea. *Popul Dev Rev* 1995;**21**:59–84. doi:10.2307/2137413  
46  
47 28 Hesketh T, Lu L, Xing ZW. The consequences of son preference and sex-selective abortion  
48 in China and other Asian countries. *Can Med Assoc J* 2011;**183**:1374–7.  
49 doi:10.1503/cmaj.101368  
50  
51  
52  
53  
54  
55



- 1  
2  
3 29 Chun H, Das Gupta M. Gender discrimination in sex selective abortions and its transition in  
4 South Korea. *Womens Stud Int Forum* 2009;**32**:89–97. doi:10.1016/j.wsif.2009.03.008  
5  
6  
7 30 Bongaarts J, Guilmo CZ. How Many More Missing Women? Excess Female Mortality and  
8 Prenatal Sex Selection, 1970–2050. *Popul Dev Rev* 2015;**41**:241–69. doi:10.1111/j.1728-  
9 4457.2015.00046.x  
10  
11  
12  
13  
14  
15  
16  
17  
18  
19  
20  
21  
22  
23  
24  
25  
26  
27  
28  
29  
30  
31  
32  
33  
34  
35  
36  
37  
38  
39  
40  
41  
42  
43  
44  
45  
46  
47  
48  
49  
50  
51  
52  
53  
54  
55  
56  
57  
58  
59  
60

For peer review only

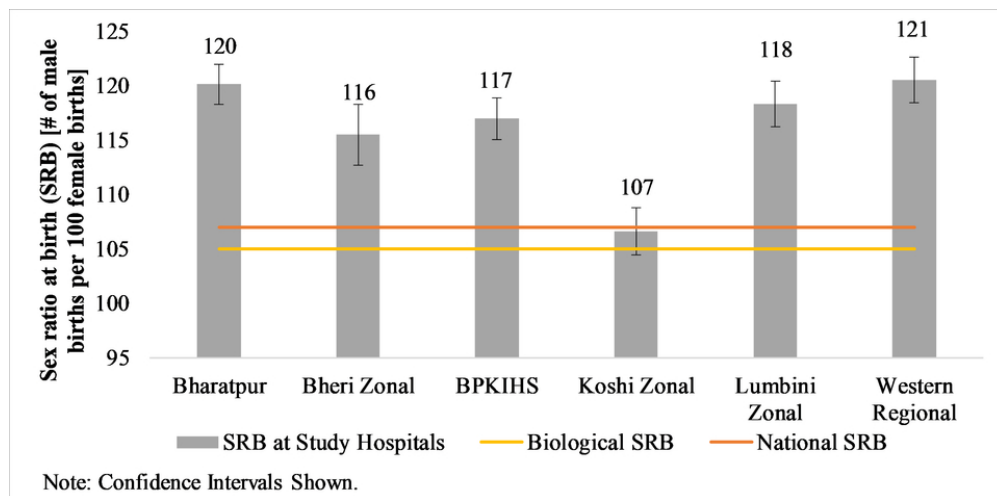

Figure 1: Sex ratio at birth at study hospitals

81x40mm (300 x 300 DPI)

1  
2  
3  
4  
5  
6  
7  
8  
9  
10  
11  
12  
13  
14  
15  
16  
17  
18  
19  
20  
21  
22  
23  
24  
25  
26  
27  
28  
29  
30  
31  
32  
33  
34  
35  
36  
37  
38  
39  
40  
41  
42  
43  
44  
45  
46  
47  
48  
49  
50  
51  
52  
53  
54  
55  
56  
57  
58  
59  
60

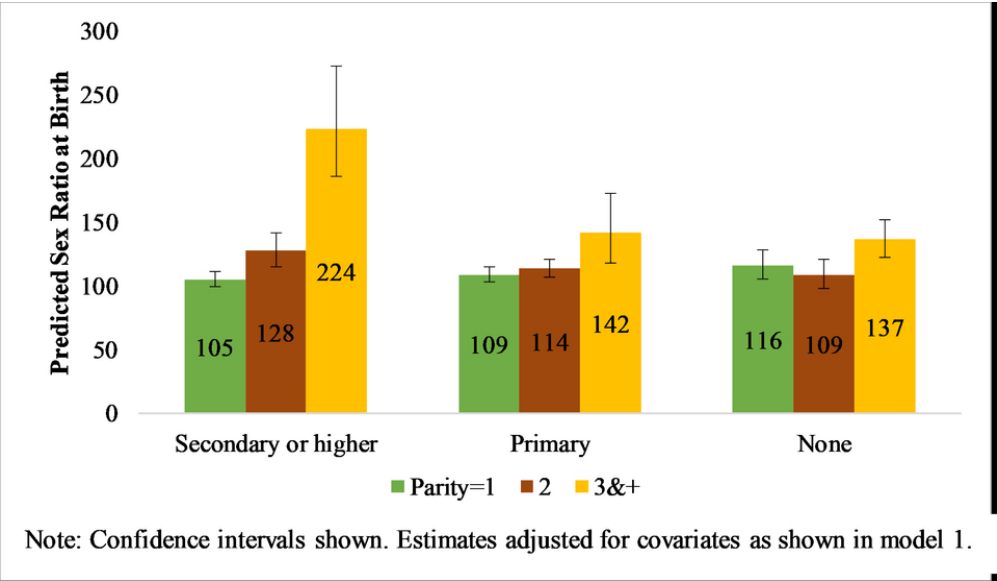

Figure 2: Predicted sex ratio at birth across women's education and parity  
81x46mm (300 x 300 DPI)

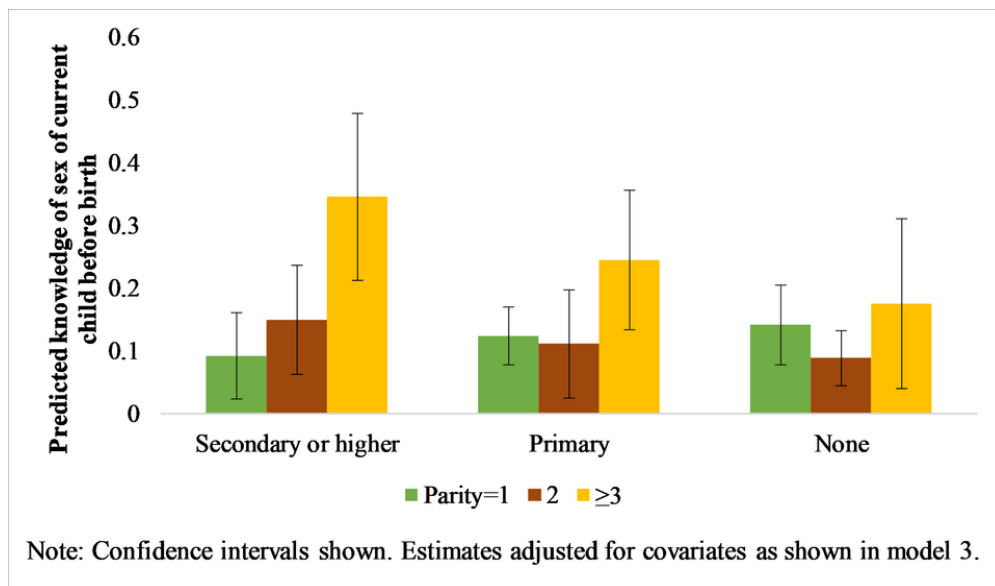

Figure 3: Predicted knowledge of sex of current child before birth across women's education and parity

81x47mm (300 x 300 DPI)

1  
2  
3  
4  
5  
6  
7  
8  
9  
10  
11  
12  
13  
14  
15  
16  
17  
18  
19  
20  
21  
22  
23  
24  
25  
26  
27  
28  
29  
30  
31  
32  
33  
34  
35  
36  
37  
38  
39  
40  
41  
42  
43  
44  
45  
46  
47  
48  
49  
50  
51  
52  
53  
54  
55  
56  
57  
58  
59  
60

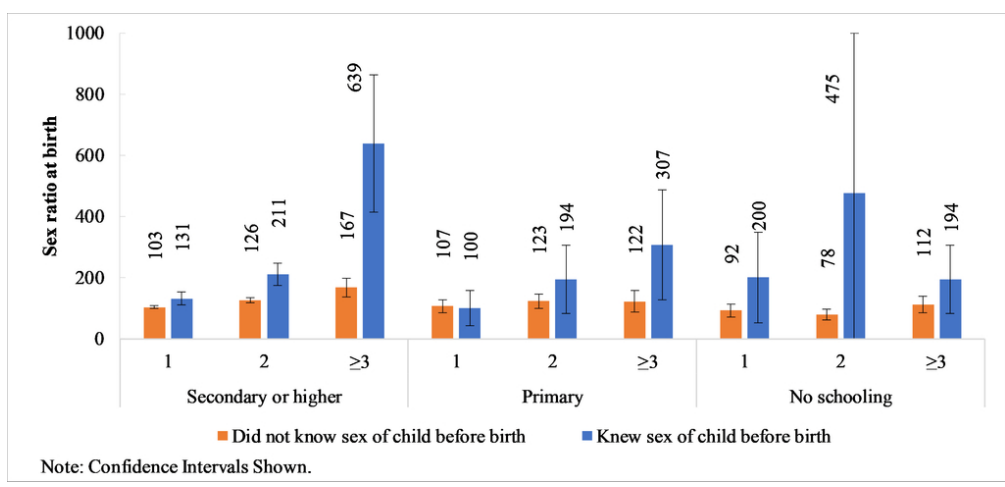

Figure 4: Sex ratio at birth across women's education, parity and knowledge of sex of child before birth

86x40mm (300 x 300 DPI)

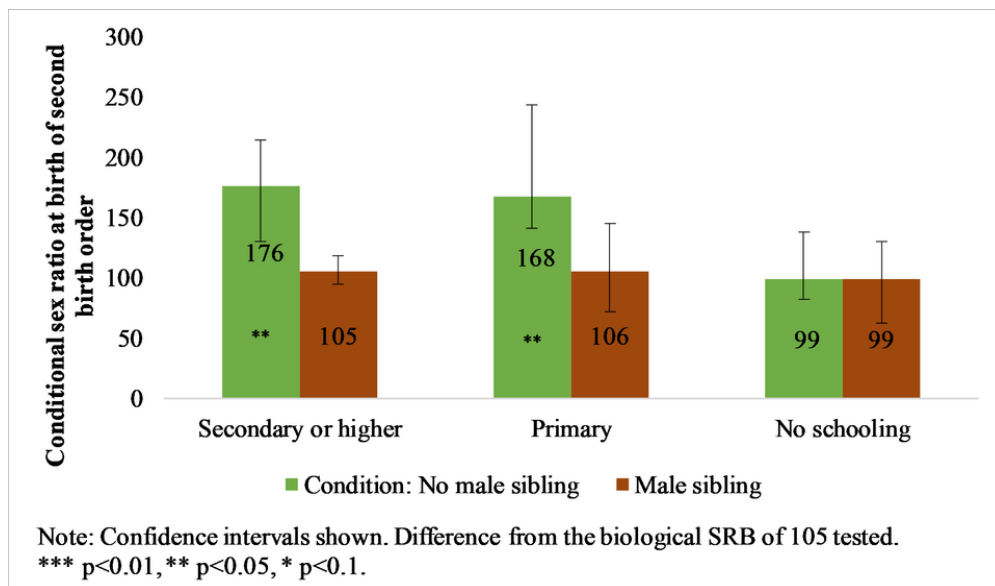

Figure 5: Sex ratio at birth of second birth order across women's education and living male child.

81x47mm (300 x 300 DPI)

1  
2  
3  
4  
5  
6  
7  
8  
9  
10  
11  
12  
13  
14  
15  
16  
17  
18  
19  
20  
21  
22  
23  
24  
25  
26  
27  
28  
29  
30  
31  
32  
33  
34  
35  
36  
37  
38  
39  
40  
41  
42  
43  
44  
45  
46  
47  
48  
49  
50  
51  
52  
53  
54  
55  
56  
57  
58  
59  
60

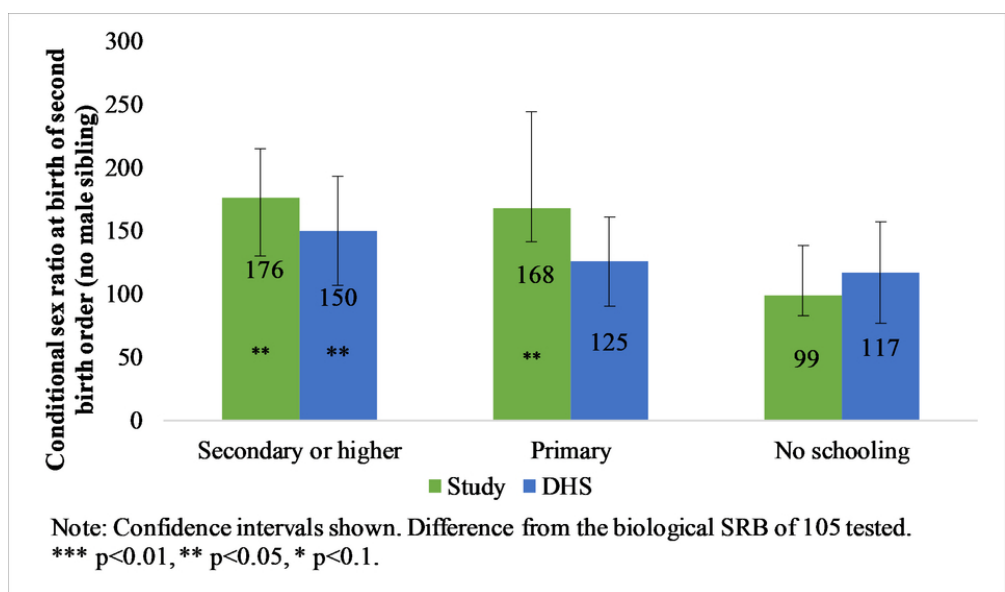

Figure 6: Conditional sex ratio at birth of second order birth with no male sibling, comparison between hospital sample (study) and Nepal DHS across education groups

81x47mm (300 x 300 DPI)

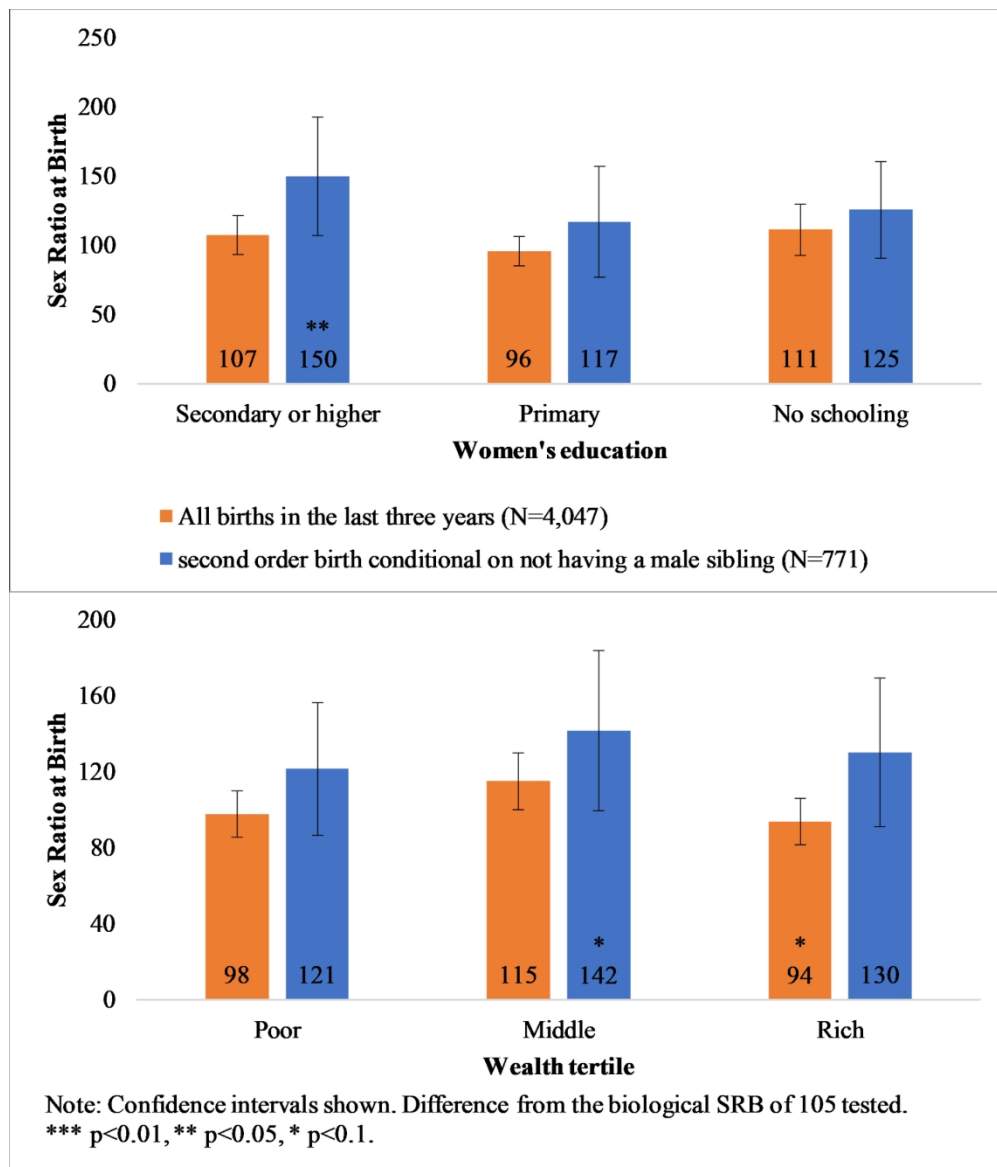

Figure 7: Sex ratio at birth across socio-demographic characteristics between all births in the last three years, and second order births conditional on having an older sister

162x189mm (300 x 300 DPI)



## APPENDIX

Appendix Figure 1: Composition of ethnic groups seeking care in study hospitals

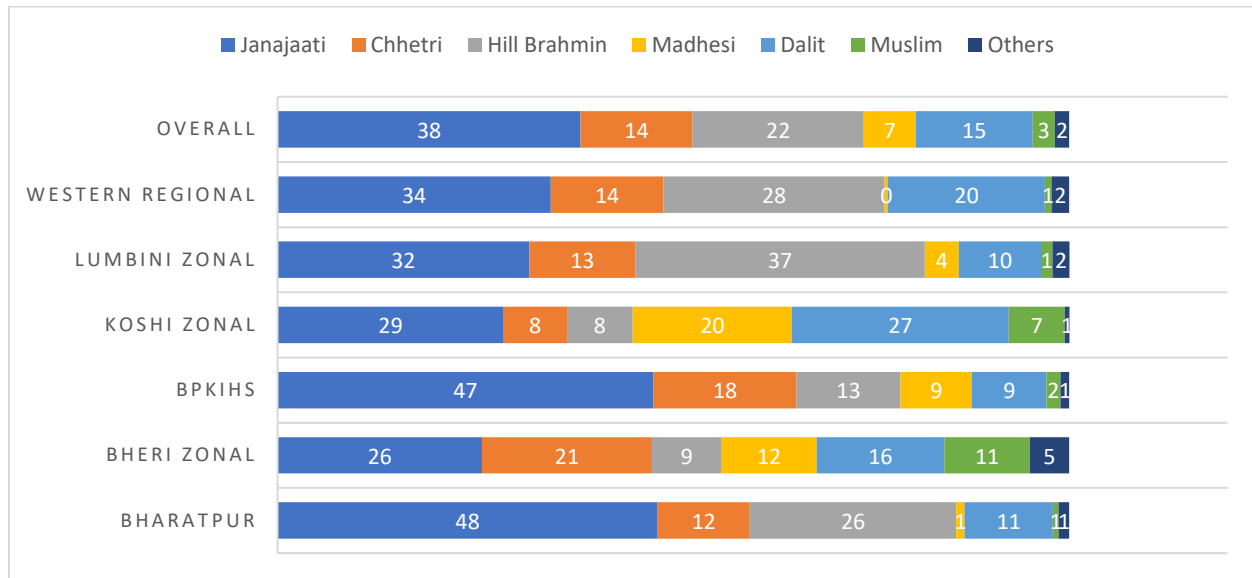

Appendix Table 1: Descriptive statistics for study data—proportions and sample size

|                                                                      | Full Sample   | Follow-up Sample | DHS sample   |
|----------------------------------------------------------------------|---------------|------------------|--------------|
| <b>Male birth</b>                                                    | 0.54          | 0.54             | 0.51         |
| <b>Mother's age</b>                                                  |               |                  |              |
| <20                                                                  | 0.14          | 0.13             | 0.09         |
| 20-24                                                                | 0.45          | 0.45             | 0.37         |
| 25-29                                                                | 0.28          | 0.29             | 0.30         |
| ≥30                                                                  | 0.13          | 0.12             | 0.24         |
| <b>Mother's education</b>                                            |               |                  |              |
| Secondary or higher                                                  | 0.81          | 0.82             | 0.48         |
| Primary                                                              | 0.10          | 0.09             | 0.20         |
| No schooling                                                         | 0.09          | 0.09             | 0.32         |
| <b>Parity</b>                                                        |               |                  |              |
| 1                                                                    | 0.58          | 0.55             | 0.24         |
| 2                                                                    | 0.32          | 0.34             | 0.32         |
| 3&+                                                                  | 0.10          | 0.11             | 0.45         |
| <b>Ethnicity</b>                                                     |               |                  |              |
| Janajaati                                                            | 0.38          | 0.35             |              |
| Chhetri                                                              | 0.14          | 0.14             |              |
| Hill Brahmin                                                         | 0.22          | 0.23             |              |
| Madhesi                                                              | 0.07          | 0.07             |              |
| Dalit                                                                | 0.15          | 0.15             |              |
| Muslim                                                               | 0.03          | 0.03             |              |
| Others                                                               | 0.02          | 0.02             |              |
| <b>Region</b>                                                        |               |                  |              |
| Terai                                                                | 0.71          | 0.76             |              |
| Hill                                                                 | 0.28          | 0.24             |              |
| Mountain                                                             | 0.01          | 0.00             |              |
| <b>Number of induced abortions</b>                                   |               |                  |              |
| 0                                                                    | 0.96          | 0.96             |              |
| 1                                                                    | 0.04          | 0.04             |              |
| 2+                                                                   | 0.01          | 0.01             |              |
| <b>Conducted ultrasound during antenatal period of current birth</b> |               | 0.93             |              |
| <b>Knew sex of current child</b>                                     |               | 0.13             |              |
| <b>Total sample size for each data sample</b>                        | <b>75,428</b> | <b>14,015</b>    | <b>4,047</b> |

# BMJ Open

## Determinants of imbalanced sex ratio at birth in Nepal: evidence from secondary analysis of a large hospital-based study, and a nationally representative survey data

|                                 |                                                                                                                                                                                                                                                                                                                                                                                                                                                                  |
|---------------------------------|------------------------------------------------------------------------------------------------------------------------------------------------------------------------------------------------------------------------------------------------------------------------------------------------------------------------------------------------------------------------------------------------------------------------------------------------------------------|
| Journal:                        | <i>BMJ Open</i>                                                                                                                                                                                                                                                                                                                                                                                                                                                  |
| Manuscript ID                   | bmjopen-2018-023021.R2                                                                                                                                                                                                                                                                                                                                                                                                                                           |
| Article Type:                   | Research                                                                                                                                                                                                                                                                                                                                                                                                                                                         |
| Date Submitted by the Author:   | 04-Dec-2018                                                                                                                                                                                                                                                                                                                                                                                                                                                      |
| Complete List of Authors:       | Pradhan, Elina; The World Bank Group, Pearson, Erin; IPAS; Johns Hopkins University Bloomberg School of Public Health<br>Puri, Mahesh; Center for Research on Environment, Population and Health Activities,<br>Maharjan, Manju; Center for Research on Environment, Population and Health Activities<br>Maharjan, Dev; Center for Research on Environment, Population and Health Activities<br>Shah, Iqbal; Harvard University T H Chan School of Public Health |
| <b>Primary Subject Heading</b>: | Global health                                                                                                                                                                                                                                                                                                                                                                                                                                                    |
| Secondary Subject Heading:      | Health policy, Global health                                                                                                                                                                                                                                                                                                                                                                                                                                     |
| Keywords:                       | PUBLIC HEALTH, REPRODUCTIVE MEDICINE, Health policy < HEALTH SERVICES ADMINISTRATION & MANAGEMENT                                                                                                                                                                                                                                                                                                                                                                |
|                                 |                                                                                                                                                                                                                                                                                                                                                                                                                                                                  |

SCHOLARONE™  
Manuscripts

# Determinants of imbalanced sex ratio at birth in Nepal: evidence from secondary analysis of a large hospital-based study, and a nationally representative survey data

Elina Pradhan<sup>1</sup>, Erin Pearson<sup>2</sup>, Mahesh Puri<sup>3</sup>, Manju Maharjan<sup>3</sup>, Dev Maharjan<sup>3</sup>, and Iqbal Shah<sup>4</sup>

<sup>1</sup>The World Bank Group, Washington, D.C.

<sup>2</sup>UNC-Chapel Hill, Chapel Hill, NC, USA

<sup>3</sup>Center for Research on Environment, Health and Population Activities (CREHPA), Kathmandu, Nepal.

<sup>4</sup>Harvard T.H. Chan School of Public Health, Boston, MA

Corresponding Author: Elina Pradhan. (T) +1 617 823 8364 (E) [epradhan@mail.harvard.edu](mailto:epradhan@mail.harvard.edu)

Word Count: 4,528

## ABSTRACT

---

**Objectives:** To quantify sex ratio at births (SRB) in hospital deliveries in Nepal, and understand the socio-demographic correlates of skewed SRB. Skewed SRBs in hospitals could be explained by sex selective abortion, and/or by decision to have a son delivered in a hospital—increased in-utero investments for male fetus. We use data on ultrasound use to quantify links between prenatal knowledge of sex, parity and skewed SRBs.

**Design:** Secondary analysis of (1) de-identified data from a randomized controlled trial, and (2) 2011 Nepal Demographic and Health Survey (NDHS)

**Setting:** Nepal

**Participants:** (1) 75,428 women who gave birth in study hospitals, (2) NDHS: 12,674 women aged 15-49

**Outcome measures:** SRB, and conditional SRB of a second child given first born male or female were calculated.

**Results:** Using data from 75,428 women who gave birth in six tertiary hospitals in Nepal between September 2015 and March 2017, we report skewed SRBs in these hospitals, with some hospitals registering deliveries of 121 male births per 100 female births. We find that a nationally representative survey (2011 NDHS) reveals no difference in the number of hospital delivery of male and female babies. Additionally, we find that: (1) estimated SRB of second-order births conditional on the first being a girl is significantly higher than the biological SRB in our study and (2) multiparous women are more likely to have prenatal knowledge of the sex of their fetus and to have male births than primiparous women with the differences increasing with increasing levels of education.

**Conclusions:** Our analysis supports sex-selective abortion as the dominant cause of skewed SRBs in study hospitals. Comprehensive national policies that not only plan and enforce regulations against gender-biased abortions, but also ameliorate the marginalized status of women in Nepal are urgently required to change this alarming manifestation of son preference.

**Key words:** Sex ratio at birth, son preference, hospital deliveries, abortions, Nepal.

1  
2  
3 Strengths and limitations of the study:  
4  
5

6 This is the first paper that explicitly quantifies associations between ultrasound access and  
7 skewed SRBs.

8 A strength of the study is that the analysis presented is based on a large sample—the  
9 primary sample is about 20% of all births in Nepal that happened during the study period.  
10 On the other hand, a limitation could be that this primary sample is not representative at  
11 the population level as it is derived from a hospital-based study.  
12

13 The study adjusts for potential socioeconomic and time-varying confounders, and presents  
14 SRBs adjusted for age, ethnicity, region, hospital fixed effects and month fixed effects.

15 Another potential limitation is that women's report of abortion history, which is a  
16 mediating variable reported, could suffer from reporting bias.  
17  
18  
19  
20  
21  
22  
23  
24  
25  
26  
27  
28  
29  
30  
31  
32  
33  
34  
35  
36  
37  
38  
39  
40  
41  
42  
43  
44  
45  
46  
47  
48  
49  
50  
51  
52  
53  
54  
55  
56  
57  
58  
59  
60

## I BACKGROUND

---

Sex ratios at birth (SRB), i.e., number of male births per 100 female births, have long been shown to be skewed in China, South Korea, some states of India and in some other East and South Asian, and North African countries, but evidence suggests that since the 1990s, skewed sex ratios are emerging in other Asian countries such as Pakistan and Vietnam [1,2]. The biologically normal sex ratio at birth ranges from 102 to 107 males per 100 females with 105 as the most common figure [3,4], but in India the national SRB is 109 compared to 120 in China [1], indicating that significantly more boys are being born than girls in these two countries, especially in China. As technology such as ultrasound has become more widely available in Asia, sex ratios have become more skewed [1,5,6]. When societies with strong son preference transition to low fertility, the desire to have male offspring becomes more acute and access to the technology can facilitate its realization. Couples may use ultrasound and other prenatal diagnostic tests for sex-selective abortion, though only about 11-27% of all ultrasound users across States in India were using ultrasound for sex-selective abortion between 1998-1999 when ultrasound was first becoming more widely available [5]. Given the trajectory of increasing sex ratios over time in Asia, it is possible that the ultrasound misuse for sex-selective abortion has increased as well as social pressure for sons has intensified with shrinking family sizes. Bhat and Zavier (2007) found that wealthier, more educated women in India had greater access to technology such as ultrasound, but ultrasound misuse for sex-selective abortion was more highly associated with region and sex composition of children already born [5,7]. Another study examining birth patterns of Indian migrants to Canada also found skewed sex ratio of higher parity births if the mothers only had girls, and furthermore, the skewed SRBs were associated with history of induced abortions [8].

In Nepal, son preference has been documented, but it has primarily manifested in women's contraceptive use and preferential care for male children, including more and higher quality food and better medical care, consistent with the 'femineglect' in health and education seen elsewhere in Asia [1,9,10]. As a result, older studies demonstrated higher under-five female compared to male mortality in Nepal due to preferential treatment and medical care for sons, but did not demonstrate skewed sex ratios at birth [1,9]. More recent studies have demonstrated that conditional sex ratios, the sex ratio for second-born child when the first-born child was female,

1  
2  
3 became skewed after abortion law was liberalized in 2002 [11]. Though sex-determination tests  
4 and sex-selective abortion are illegal in Nepal, punishable by imprisonment from 3 to 6 months  
5 [12,13], evidence suggests that it does occur [11,14]. Abortion providers report difficulty  
6 ascertaining whether families are seeking abortion for sex-selection purposes, and fear that women  
7 will resort to unsafe abortion if they are under pressure to bear sons but unable to access safe  
8 abortion services [14]. A comparison of two districts in Nepal found that many conditions led to  
9 higher SRB in one district compared to the other, including greater access to ultrasound due to  
10 more facilities offering diagnostic services and greater purchasing power, less enforcement of the  
11 law barring sex-selective abortion, desire for fewer children, and fewer community-based  
12 programs on gender equity [12].  
13  
14  
15  
16  
17  
18  
19  
20

21 This is the first paper that shows highly skewed sex ratios from facility births in Nepal, and  
22 explicitly quantifies associations between ultrasound access and skewed SRBs. Women attending  
23 the facilities in the study generally have access to high quality care, including access to ultrasound  
24 technology, which is available in most study hospitals. Ultrasound may act on SRBs in these  
25 hospitals through two pathways: 1) sex-selective abortion, or 2) increased investment in delivery  
26 care for male babies. The present study explores potential pathways leading to skewed sex ratios  
27 in Nepal's largest hospitals by comparing estimates from the hospital-based sample with high  
28 access to ultrasound services to population-based estimates from Nepal's 2011 Demographic and  
29 Health Survey [15]. The main objective is, therefore, to examine if skewed sex ratio at birth prevail  
30 on hospital deliveries compared to all births in a nationally representative household survey and  
31 the primary pathways leading to such outcome.  
32  
33  
34  
35  
36  
37  
38  
39  
40  
41

## 42 II DATA AND METHODS

---

### 45 II.A STUDY DESIGN

46 We assess SRB by geographic divisions and socio-demographic background characteristics of  
47 women using data from a multi-site facility-based survey of postpartum women in six of the largest  
48 hospitals in Nepal and from a population-based nationally representative survey (NDHS).  
49  
50  
51  
52  
53  
54  
55  
56  
57  
58  
59  
60



## II.B DATA

The 2011 NDHS included 12,674 ever-married women aged 15-49, and the sample for the analysis included 4,047 births in the five years preceding the survey. The longitudinal data come from a hospital-based survey conducted as part of an evaluation of postpartum contraceptive services in six hospitals in Nepal. The six hospital sites were: Bharatpur Regional Hospital, B.P. Koirala Institute of Health Sciences (BPKIHS), Koshi Zonal Hospital, Lumbini Zonal Hospital, Western Regional Hospital and Bheri Zonal hospital. These sites span all the way from mid-western development zone to the eastern development zone; two hospitals are in the hilly region and four in the Terai. There are also some differences in the ethnic groups served by these hospitals (Appendix Figure 1)—27% of women who gave birth in Koshi Zonal hospital are so called “untouchables” (Dalits) versus only 9% in BPKIHS; 48% of women served by BPKIHS are indigenous group (Janajaatis) versus 25% in Bheri Zonal.

Women were enrolled in the study over a period of 18 months and completed a short questionnaire after delivery, before they are discharged from the hospital. A sample of those enrolled in the study were also approached for follow-up questionnaires at 9 months and 18 months postpartum. Inclusion criteria are that women have had a live birth, delivered in one of the six study hospitals, and reside in Nepal. Detailed study protocol has been published [16].

Out of a total of 75,897 women eligible for the study in the enrollment period (September 2015-March 2017), 75,587 (99.6%) consented to be interviewed, and interviews were conducted prior to discharge from hospital after delivery. The full sample used in this study constitutes of 75,428 women who consented to answering questions pertaining to variables analyzed in this paper.

The 9-month survey captures information not available in the 2011 NDHS, including a detailed assessment of ultrasound use during the recent pregnancy and previous pregnancies. The 9-month survey also captures the sex composition of all children born, and conditional sex ratios for second-born child given the sex of the first-born child will be calculated and compared to our estimates from the 2011 NDHS. This nine-month follow-up sample includes 14,015 women, with follow-up rate of 57.4%.

## II.C METHODS

Sex ratios were calculated for all births by dividing the total number of boys born by the total number of girls born, and multiplying by 100. Conditional sex ratios were calculated for second order births. Conditional sex ratios assess the ratio of second order boys to second order girls given the sex of the first child. Conditional sex ratios are often used to provide evidence for sex-selective abortion as women who want or are pressured to have a son are likely to take action at parity two, especially in the context of shrinking family size [11,17,18]. A sex ratio or conditional sex ratio of greater than 100 indicates more boys born compared to girls, and a sex ratio of less than 100 indicates more girls born compared to boys, while the biological ratio is estimated at 105 male-to-female births. The claim of skewed sex ratio at birth is made when the SRB calculated is statistically different from the biological SRB.

Linear regression models with hospital and month fixed effects are used to estimate the association between women's socio-demographic characteristics and male birth. The hospital and month fixed effects control for any hospital-specific or time-specific changes to the outcomes unrelated to the intervention, including any potential impact of the April 2015 earthquakes in Nepal [19]. Equation (1) below represents the multivariate model, where we interact women's education and parity to understand any multiplier effects of these two variables on male preference for woman  $i$ , hospital  $h$  and month  $t$ . We also control for region, ethnicity, woman's age, abortion history, hospital fixed effects and month fixed effects.

$$Y_{it} = \beta_0 + \beta_1 \text{Education}_i + \beta_2 \text{Parity}_i + \beta_3 \text{Region}_i + \beta_4 \text{Ethnicity}_i + \beta_5 \text{Age}_i + \beta_6 \text{AbortionHistory}_i + \beta_7 \text{Hospital}_h + \beta_8 \text{Month}_t + \epsilon_{it} \quad (1)$$

Outcomes for women who visit the same hospitals are likely to be correlated with each other. For example, social norms about family size and son preference could be localized in a geographic area. Hence, inference needs to be corrected for this potential correlation in each hospital cluster. Since we only have six hospitals or six clusters in our study, the standard cluster robust variance estimator can over-reject the null hypothesis [20]. We use the wild cluster bootstrap method with six-point bootstrap weight distribution to estimate the statistical significance of the effect size for all regression models [21–23].

We use questions asked in our nine-month follow-up on a subset of women randomly selected (among women who lived within 24 hours of travel time from the hospital) at the time of enrollment to understand any links between ultrasound prevalence, knowing the sex of the child before birth and male child born at the study hospital. Similar to model (1), equations (2) and (3) below are the models we use to understand if any of women’s socio-demographic characteristics are linked with ultrasound performed during antenatal period of the current birth, and if the mother reports knowledge of sex of the child before birth.

$$\beta_0 + \beta_1 \text{Ultrasound} + \beta_2 \text{Male Child} + \beta_3 \text{Knowledge of Sex} + \beta_4 \text{Education} + \beta_5 \text{Parity} + \beta_6 \text{Age} + \beta_7 \text{Wealth Tertile} + \epsilon \quad (2)$$

$$\beta_0 + \beta_1 \text{Ultrasound} + \beta_2 \text{Male Child} + \beta_3 \text{Knowledge of Sex} + \beta_4 \text{Education} + \beta_5 \text{Parity} + \beta_6 \text{Age} + \beta_7 \text{Wealth Tertile} + \beta_8 \text{Hospital-based} + \epsilon \quad (3)$$

We then estimate sex ratio at births across mothers’ education group, parity and prenatal knowledge of sex, followed by a descriptive picture of conditional SRBs in our study sample, and the NDHS sample.

Finally, we perform stepwise linear regression using NDHS data to understand whether boys born in the last five years were more likely to be delivered in hospitals, adjusting for women’s socio-demographic characteristics (equation (4)). This stepwise method adds each of the potentially relevant socioeconomic variables such as woman’s education, parity, age and household wealth tertile ( ) to the model in addition to male child as explanatory variables, and could allow us to identify any models where male births were significantly related to hospital-based deliveries. We could potentially assert the dominance of female foeticide as the primary reason behind skewed SRBs if we did not find a significant relationship between hospital-based deliveries and male births in these models.

$$\beta_0 + \beta_1 \text{Ultrasound} + \beta_2 \text{Male Child} + \beta_3 \text{Knowledge of Sex} + \beta_4 \text{Education} + \beta_5 \text{Parity} + \beta_6 \text{Age} + \beta_7 \text{Wealth Tertile} + \beta_8 \text{Hospital-based} + \epsilon \quad (4)$$

### Patient and Public Involvement:

The patients and the public were not directly involved in the development of research question, outcome measures, or the design of the study. Respondents were women who delivered in the study hospitals and provided consent to participate in the study. The research question was informed by the available data on the status of women in the country and the region, and the results are being incorporated in an early preparation state of Nepal's national strategy to prevent gender-biased sex selection.

### III RESULTS

---

Figure 1 shows the sex ratio at birth at the six study hospitals. The biological ratio is 105, and according to Nepal census 2011, the sex ratio at birth for Nepal is 107 [24]. The ratio of births at the study hospitals is substantially higher than either the biological ratio or the national average. We observe the highest SRB at Western Regional and Bharatpur hospital, with the ratio of 121 and 120 male births per 100 female births, respectively. The sex ratio at birth in our overall sample is also significantly higher than the national average of 107—we find that 117 male births took place in the study hospitals for every 100 female births.

Table 1, data column 1 presents association between socio-demographic factors with male births in our study hospitals based on model 1. The descriptive statistics for the variables used in this regression are tabulated in Appendix Table 1. We find that higher order births are more likely to be male, and a mother with secondary schooling having her third (or higher order) child is 18 percentage points more likely to deliver a male child compared to a woman who has just given birth to her first child. Chhetri women are more likely to have male births compared to Janajaatis. There is significant interaction effect of parity and mother's education when predicting male birth. Furthermore, male birth is not associated with the mother's history of induced abortion.

Table 1: Association of socio-demographic factors with male births, ultrasound during ANC and knowledge of sex of current child before birth in study hospitals

|                                               | Male Birth |                   | Ultrasound during ANC |                    | Knew the sex of the current child before birth |                      |
|-----------------------------------------------|------------|-------------------|-----------------------|--------------------|------------------------------------------------|----------------------|
|                                               | Est.       | 95% CI            | Est.                  | 95% CI             | Est.                                           | 95% CI               |
| Mother's Age (Ref: <20)                       |            |                   |                       |                    |                                                |                      |
| 20-24                                         | 0.006      | [-0.002 - 0.014]  | 0.014**               | [0.000 - 0.028]    | -0.009                                         | [-0.026 - 0.008]     |
| 25-29                                         | 0.010      | [-0.009 - 0.025]  | 0.030***              | [0.015 - 0.044]    | 0.002                                          | [-0.017 - 0.021]     |
| S ?                                           | 0.014**    | [0.007 - 0.032]   | 0.043***              | [0.025 - 0.061]    | 0.040***                                       | [0.014 - 0.067]      |
| Mother's Education (Ref: Secondary or higher) |            |                   |                       |                    |                                                |                      |
| Primary                                       | 0.009      | [-0.006 - 0.035]  | -0.052***             | [-0.079 - -0.024]  | 0.032**                                        | [0.001 - 0.063]      |
| No schooling                                  | 0.025      | [-0.012 - 0.058]  | -0.130***             | [-0.169 - -0.089]  | 0.049***                                       | [0.015 - 0.083]      |
| Parity (Ref: 1)                               |            |                   |                       |                    |                                                |                      |
| 2                                             | 0.049***   | [0.014 - 0.078]   | -0.020***             | [-0.029 - -0.011]  | 0.056***                                       | [0.041 - 0.072]      |
| S                                             | 0.178***   | [0.136 - 0.210]   | -0.028***             | [-0.045 - -0.011]  | 0.252***                                       | [0.217 - 0.289]      |
| Mother's Education*Parity                     |            |                   |                       |                    |                                                |                      |
| Primary*2                                     | -0.038*    | [-0.090 - 0.000]  | 0.001                 | [-0.040 - 0.042]   | -0.070***                                      | [-0.112 - -0.026]    |
| - 8 R S                                       | -0.113***  | [-0.151 - -0.054] | -0.006                | [-0.056 - 0.043]   | -0.131***                                      | [-0.204 - -0.058]    |
| No schooling*2                                | -0.065**   | [-0.124 - -0.011] | 0.007                 | [-0.049 - 0.064]   | -0.109***                                      | [-0.153 - -0.064]    |
| No R S                                        | -0.139***  | [-0.198 - -0.074] | -0.050*               | [-0.104 - 0.004]   | -0.219***                                      | [-0.278 - -0.159]    |
| Ethnicity (Ref: Janajaati)                    |            |                   |                       |                    |                                                |                      |
| Chhetri                                       | 0.013**    | [0.002 - 0.034]   | 0.028***              | [0.017 - 0.038]    | -0.0001                                        | [-0.018 - 0.018]     |
| Hill Brahmin                                  | 0.011      | [-0.002 - 0.025]  | 0.022***              | [0.014 - 0.030]    | 0.007                                          | [-0.008 - 0.022]     |
| Madhesi                                       | 0.005      | [-0.068 - 0.049]  | -0.024**              | [-0.047 - -0.001]  | -0.005                                         | [-0.027 - 0.018]     |
| Dalit                                         | -0.005     | [-0.018 - 0.009]  | -0.015**              | [-0.030 - -0.001]  | 0.002                                          | [-0.016 - 0.020]     |
| Muslim                                        | -0.028**   | [-0.068 - -0.007] | 0.014                 | [-0.021 - 0.049]   | -0.028*                                        | [-0.058 - 0.002]     |
| Others                                        | 0.025*     | [-0.003 - 0.049]  | 0.032**               | [0.003 - 0.060]    | 0.045*                                         | [-0.002 - 0.091]     |
| Region (Ref: Terai)                           |            |                   |                       |                    |                                                |                      |
| Hill                                          | 0.003      | [-0.020 - 0.011]  | -0.006                | [-0.022 - 0.010]   | -0.016                                         | [-0.043 - 0.012]     |
| Mountain                                      | 0.003      | [-0.090 - 0.042]  | -0.295                | [-51.884 - 51.213] | -0.105                                         | [-102.651 - 103.068] |
| Number of Abortions (Ref: 0)                  |            |                   |                       |                    |                                                |                      |
| 1                                             | 0.0003     | [-0.022 - 0.035]  | 0.019**               | [0.003 - 0.035]    | 0.0363**                                       | [0.002 - 0.070]      |
| 2+                                            | 0.050      | [-0.006 - 0.100]  | 0.055***              | [0.024 - 0.084]    | 0.068                                          | [-0.031 - 0.164]     |
| Constant                                      | 0.518***   | [0.474 - 0.551]   | 0.951***              | [0.932 - 0.970]    | 0.245***                                       | [0.217 - 0.274]      |
| Observations                                  | 75,428     |                   | 14,015                |                    | 13,113                                         |                      |
| R-squared                                     | 0.009      |                   | 0.111                 |                    | 0.077                                          |                      |

Note: Difference from null tested using wild cluster bootstrap method.  
All regression models adjusted for hospital and month fixed effects. \*\*\* p<0.01, \*\* p<0.05, \* p<0.1.

1  
2  
3 An estimate of interest is the sex ratio at birth for education and parity, adjusted for other covariates  
4 as shown in equation 1. Figure 2 shows the sex ratio at birth across women's education and parity  
5 predicted from this model. Predicted SRB for women with at least secondary schooling who are  
6 giving birth for the first time is 105 male births/ 100 female births. However, this estimate skews  
7 drastically with increasing parity. SRB for women with at least secondary schooling with parity  
8 three or higher is estimated at 224 male births per 100 female births.  
9  
10  
11  
12  
13

14 As discussed previously, there could be two pathways through which deliveries at these large  
15 tertiary hospitals are skewed by sex. One could be sex-selective abortion, which will skew the ratio  
16 of male births to female births. The other is the selective investment pathway, where families upon  
17 prior knowledge of the sex of their fetus place higher value in the health and delivery of the male  
18 fetus than of the female, and hence selectively choose to travel to a hospital to deliver a male child.  
19 We now present analysis from the nine-month follow-up to illustrate correlates of access and use  
20 of ultrasound, and women's knowledge of the sex of the fetus prior to the birth.  
21  
22  
23  
24  
25  
26  
27

28 Column 3 in Table 1 presents correlates of ultrasound conducted during antenatal period of the  
29 current birth, controlling for hospital and month fixed effects. Older women are more likely to  
30 have ultrasound conducted during the antenatal period of their current child, and ultrasound  
31 prevalence is higher among educated women compared to women with no schooling. Compared  
32 to Janajaati ethnic group, Hill Brahmins and Chhetris are more, and Madhesis and Dalits are less  
33 likely to have conducted ultrasound. Women who report history of abortion are more likely to have  
34 conducted ultrasound for their current birth.  
35  
36  
37  
38  
39  
40

41 As discussed before, facilitating or conducting sex determination tests is illegal in Nepal. However,  
42 we find that 13% of the women in our follow-up sample report knowing the sex of their child  
43 before birth. Similar to correlates of male birth, women reporting knowledge of the sex of their  
44 fetus before birth is also correlated with women's education and parity with significant interactions  
45 between these covariates (Table 1, column 5). Along the education gradient, an estimated 35% of  
46 women with at least secondary schooling at parity three or more report knowledge of the sex of  
47 their child before birth as compared to 18% of women with no schooling at the same category of  
48 parity (Figure 3). Along the parity gradient, among women with at least secondary schooling,  
49  
50  
51  
52  
53  
54  
55

1  
2  
3 primiparous women are 25 percentage points less likely to report that they know the sex of their  
4 child before birth.  
5  
6

7  
8 The estimated sex ratios at birth are remarkably different across women who report knowledge of  
9 sex of the current child before birth. Figure 4 illustrates SRB for women across parity, education  
10 groups and knowledge of the sex of the fetus. Consistently across all categories, we find that  
11 women who report that they know the sex of the fetus are more likely to give birth to a male child  
12 than a female child. For example, women who reported knowledge of the sex of fetus, with parity  
13 three or higher who have at least secondary schooling had 6.4 times as many boys than girls.  
14  
15  
16  
17

18  
19 To further understand the interaction between parity and education, we sub-select women having  
20 their second child, and estimate the conditional sex ratio at birth across women's educational  
21 groups differentiating between those who report having a living son from their first birth to those  
22 who do not (either the first-born was a daughter, or it was a son who has passed away) (Figure 5).  
23 We find that the sex of the second birth is not significantly different from the biological SRB if  
24 women already have a living son, but women with any education tend to have a significantly higher  
25 number of sons in their second birth if they do not have a living son. Women with any schooling  
26 are estimated to have 1.7 times as many sons than daughters in our study hospital in their second  
27 birth if they do not have a living son.  
28  
29  
30  
31  
32  
33  
34

35  
36 The estimates observed in the analyses shown until now are based on surveys for which enrollment  
37 took place in study hospitals, and the sample only includes women who chose to give birth in those  
38 hospitals. In the analysis below, we compare our results on estimates of conditional sex ratio at  
39 birth from the hospital sample with the nationally representative 2011 NDHS data. First, we  
40 compare the sex ratio at birth of second order births for those without male siblings across study  
41 data and NDHS (Figure 6). Similar to the hospital sample estimates, we find that the NDHS  
42 estimates of sex ratio at birth of second order births conditional on not having a living male sibling  
43 is significantly higher than biological SRB, at 150 male births per 100 female births.  
44  
45  
46  
47  
48  
49

50  
51 In Figure 7, we illustrate any differentials in sex ratio of all births versus second order births  
52 conditional on having an older sister, in analysis similar to Frost et al. (2013) using the nationally  
53 representative NDHS data. Compared to all births in the past three years, the sex ratio of second  
54  
55

1  
2  
3 order births with an older girl sibling is higher by 13 points—the sex ratio at birth of second order  
4 births who do not have a living male sibling is 132. Mothers with at least secondary schooling are  
5 much more likely to bear a son in the second birth conditional on not having a living son—on  
6 average, women with at least secondary schooling have 107 boys to 100 girls, but if they have a  
7 girl as a first born or if their first-born son has passed away, they are 1.5 times more likely to have  
8 a son rather than a daughter for their second child. Differences in SRB across first birth and  
9 conditional second birth also hold across the wealth quintile-levels in the 2011 NDHS, although  
10 the differences are not statistically significant likely because of small sample size of the conditional  
11 SRB estimates.  
12  
13  
14  
15  
16  
17  
18  
19

20 We tabulate the results of stepwise regression associating male babies and hospital-based delivery  
21 adjusting for mother's sociodemographic characteristics in Table 2. We find that boys are not more  
22 likely to be delivered in hospitals as compared to girls. As the corresponding data columns in Table  
23 2 show, the link between hospital-based births and sex of the child is not significant across the  
24 different levels of stepwise regression.  
25  
26  
27  
28  
29  
30  
31  
32  
33  
34  
35  
36  
37  
38  
39  
40  
41  
42  
43  
44  
45  
46  
47  
48  
49  
50  
51  
52  
53  
54  
55  
56  
57  
58  
59  
60



Table 2: Association between hospital-based delivery and male births in NDHS, stepwise regression

|                                               | Dependent variable: Hospital-based delivery |                                |                                |                                |                                |                                |                                |
|-----------------------------------------------|---------------------------------------------|--------------------------------|--------------------------------|--------------------------------|--------------------------------|--------------------------------|--------------------------------|
|                                               | (1)                                         | (2)                            | (3)                            | (4)                            | (5)                            | (6)                            | (7)                            |
| Male child                                    | 0.003<br>[-0.025 - 0.030]                   |                                | -0.005<br>[-0.031 - 0.021]     | -0.025<br>[-0.077 - 0.026]     | -0.023<br>[-0.074 - 0.027]     | -0.022<br>[-0.072 - 0.028]     | -0.014<br>[-0.063 - 0.034]     |
| Mother's Education (Ref: Secondary or higher) |                                             |                                |                                |                                |                                |                                |                                |
| Primary                                       |                                             | -0.231***<br>[-0.282 - -0.180] | -0.231***<br>[-0.282 - -0.180] | -0.256***<br>[-0.322 - -0.191] | -0.218***<br>[-0.284 - -0.152] | -0.200***<br>[-0.266 - -0.133] | -0.081**<br>[-0.147 - -0.016]  |
| No schooling                                  |                                             | -0.335***<br>[-0.381 - -0.288] | -0.335***<br>[-0.382 - -0.288] | -0.347***<br>[-0.402 - -0.292] | -0.253***<br>[-0.310 - -0.196] | -0.247***<br>[-0.303 - -0.191] | -0.101***<br>[-0.156 - -0.045] |
| Male child*Mother's education                 |                                             |                                |                                |                                |                                |                                |                                |
| Male child, Primary                           |                                             |                                |                                | 0.048<br>[-0.024 - 0.120]      | 0.049<br>[-0.023 - 0.121]      | 0.045<br>[-0.027 - 0.116]      | 0.048<br>[-0.022 - 0.118]      |
| Male child, No schooling                      |                                             |                                |                                | 0.023<br>[-0.034 - 0.080]      | 0.012<br>[-0.043 - 0.068]      | 0.011<br>[-0.044 - 0.067]      | 0.011<br>[-0.042 - 0.065]      |
| Parity (Ref: 1)                               |                                             |                                |                                |                                |                                |                                |                                |
| 2                                             |                                             |                                |                                |                                | -0.096***<br>[-0.143 - -0.050] | -0.129***<br>[-0.175 - -0.083] | -0.121***<br>[-0.163 - -0.079] |
| S                                             |                                             |                                |                                |                                | -0.210***<br>[-0.253 - -0.167] | -0.277***<br>[-0.327 - -0.228] | -0.227***<br>[-0.276 - -0.178] |
| Mother's Age (Ref: <20)                       |                                             |                                |                                |                                |                                |                                |                                |
| 20-24                                         |                                             |                                |                                |                                |                                | 0.078**<br>[0.016 - 0.140]     | 0.047<br>[-0.011 - 0.106]      |
| 25-29                                         |                                             |                                |                                |                                |                                | 0.157***<br>[0.089 - 0.225]    | 0.100***<br>[0.036 - 0.165]    |
| >=30                                          |                                             |                                |                                |                                |                                | 0.151***<br>[0.076 - 0.226]    | 0.110***<br>[0.040 - 0.181]    |
| Household wealth tertile (Ref: Poor)          |                                             |                                |                                |                                |                                |                                |                                |
| Middle                                        |                                             |                                |                                |                                |                                |                                | 0.104***<br>[0.065 - 0.144]    |
| Rich                                          |                                             |                                |                                |                                |                                |                                | 0.353***<br>[0.299 - 0.407]    |
| Constant                                      | 0.281***<br>[0.248 - 0.313]                 | 0.484***<br>[0.441 - 0.528]    | 0.487***<br>[0.441 - 0.533]    | 0.498***<br>[0.447 - 0.549]    | 0.573***<br>[0.521 - 0.625]    | 0.493***<br>[0.423 - 0.564]    | 0.258***<br>[0.186 - 0.331]    |
| Observations                                  | 4,047                                       | 4,047                          | 4,047                          | 4,047                          | 4,047                          | 4,047                          | 4,047                          |
| R-squared                                     | 0.000                                       | 0.108                          | 0.109                          | 0.109                          | 0.137                          | 0.146                          | 0.225                          |

Note: Standard errors clustered at the primary sampling unit level.

## IV DISCUSSION

---

Our analysis shows evidence of skewed sex ratio of deliveries in six large public hospitals in Nepal. Consistent with the literature on determinants of son preference and sex-selective abortion, we show that male birth in the study hospitals is correlated with higher parity births and higher education of mothers. Using the nationally representative NDHS, we also find that male babies are no more likely to be delivered in hospitals than female babies, adjusting for the mother's sociodemographic characteristics, which suggests sex-selective abortion as the primary reason behind skewed SRBs.

We find that more educated women, and women having higher parity births are more likely to use sex-determination tests for the child. Similar to Frost et al. (2013) [11], we show that the gender imbalance is higher in second order births compared to all births in our study sample, and these differences are larger in more educated women, and women from richer households. With increasing preference for smaller family size and persistent son preference, households face the pressure of balancing the sex of their children while having a small family size. Consistent with the literature from India discussed in the background section, women with more resources and more knowledge have greater access to ultrasound technologies, but the extent of use of these technologies for sex-selective abortion was dependent on sex composition of their children who were already born [5].

We did not find male birth to be significantly correlated with the mother's abortion history. This could be interpreted in two ways. If the abortion reporting is accurate, then the skewed sex ratio in the hospital births could be attributed to the additional investment pathway, which is that the knowledge of the sex of the fetus led to the family delivering the male fetus in the hospital. However, abortion is often underreported in which case male birth might be correlated with the true, but unknown, abortion history. In this case, the first pathway of female foeticide is a likely explanation for skewed SRB. Families and women who have undergone sex-selective abortion may be differentially more likely to report that they do not have a history of induced abortion, in which case the estimate of abortion history on male birth will be an underestimate.

1  
2  
3 A major limitation of this study is potential reporting bias on key mediating parameters. Women  
4 are likely to under-report experience of induced abortion which could be an important explanatory  
5 link in understanding the skewed SRBs. Furthermore, even though 13% of the women in the survey  
6 reported knowing the sex of the child despite sex-determination tests being illegal in Nepal, the  
7 women who were conscious of the illegal nature of the tests could have chosen to not report that  
8 they conducted in-utero sex-determination tests for their current birth. Hence, the knowledge of  
9 the sex of the current birth before delivery could also be underreported.  
10  
11

12  
13  
14  
15  
16 Another potential limitation of the study is that there is considerable loss to follow up for the  
17 sample that the prenatal sex knowledge questions are derived from. However, comparison of the  
18 covariates between the full sample and the follow up sample (Appendix Table 1) shows that  
19 women in the two samples have about the same distribution of age, educational levels, parity, male  
20 births, and history of induced abortions.  
21  
22  
23  
24  
25

26 Our hospital-based study is focused on women who gave birth in health facilities in Nepal, and  
27 this sample is selective, and might not be representative of all births nationally, as 57% of all live  
28 births in five years preceding the 2016 DHS took place in a health facility [25]. Additionally, 81%  
29 of women in our hospital-based sample had at least secondary schooling, whereas only 48% of the  
30 women in the 2011 DHS sample had at least secondary schooling—the women in our sample are  
31 more educated, younger and have fewer children than the women in the nationally representative  
32 NDHS. This phenomenon of skewed SRB could be localized to younger and more educated  
33 mothers, which would be analogous to findings from other countries where skewed SRBs are  
34 reported [1,3,5].  
35  
36  
37  
38  
39  
40  
41

42 Albeit from a selected sample, we contribute to the literature by reporting on skewed sex ratio at  
43 birth in Nepal across socio-demographic characteristics, using a large sample which accounts for  
44 about 20% of all births in Nepal during the study period. We find that women's education, which  
45 is a proxy variable for measuring access to health services (mainly knowledge), and parity are  
46 important correlates of male births and reports of sex-determination tests. Although comprising of  
47 only hospital-births, this striking phenomenon covers 20% of all births in Nepal during the year  
48 and a half of the survey period –the large sample size also adds to the significance and validity of  
49 our results-- Comparing conditional SRBs in nationally representative NDHS and in the hospital  
50  
51  
52  
53  
54  
55

1  
2  
3 sample we find that SRB for all births (not only hospital births) was significantly higher for second  
4 order births if the first order birth was a girl, which suggests the sex-selective abortion pathway.  
5 Additional findings on (1) women reporting knowledge of the sex of the fetus and significantly  
6 differential SRBs across the socio-economic groups, and (2) no correlation of male births with  
7 facility deliveries using the nationally representative sample further support the sex-selection  
8 abortion pathway.  
9  
10  
11  
12  
13

14 The Trivers-Willard effect would be consistent with more educated and wealthy women having  
15 more sons as they are generally in better health condition [21]. However, Figure 5, which illustrates  
16 SRBs for second order births differentially among those with male siblings and no male siblings  
17 suggest that sociological son preference is still overwhelmingly the primary reason for skewed sex  
18 ratio at births among educated women—the conditional SRB of second order births with male  
19 siblings among women with at least secondary schooling is 105, as compared to 176 for those  
20 without any male siblings.  
21  
22  
23  
24  
25  
26

27 Nepal has seen a rapid decline in actual and desired fertility rates over the last forty years.  
28 However, the reduction in desired fertility exists in a society with persistent preferences for a son,  
29 because of cultural and religious norms, and economic rationale. Aside from the religious norms  
30 such as sons being necessary to perform death rituals in Hinduism, parents have an economic  
31 incentive to have sons in an environment where (1) strong filial (social and financial) ties exist  
32 between parents and children, (2) women are not able to realize their full economic earning  
33 potential, and (3) daughters are considered to “belong” to another family after marriage. The  
34 marginalized status of women, coupled with increasing access to sex-selection technology and  
35 lack or weak enforcement of the law is further skewing sex ratio at births in Nepal.  
36  
37  
38  
39  
40  
41  
42  
43

44 Imbalanced sex ratios at birth (SRB) are not immutable as evidenced from South Korea. SRBs in  
45 South Korea rose from 109 in 1985 to 115 in 1994, but then declined reaching 105 in 2016 [26].  
46 Most remarkable are the 2016 SRB figures by birth order –104 for the first order births, 105 for  
47 the second, and 107 for the (fewer) third or higher order births. This transition to balanced SRB  
48 has been achieved by a combination of factors resulting in raising the status and empowerment of  
49 women [27]. Increased opportunities for higher education and better employment contributed to  
50 women’s autonomy coupled with laws and policies addressing women’s rights. The law  
51  
52  
53  
54  
55  
56

1  
2  
3 recognizing women's inheritance and other rights within their birth family following marriage  
4 contributed to redressing the traditional gender imbalance that existed in Korea. Media campaigns  
5 such as "Love your daughters" and other measures such as strict enforcement of laws prohibiting  
6 the misuse of technology for sex determination, increased exposure to mass media, weakening of  
7 traditional patrilineal norms with increasing urbanization and industrialization and expansion of  
8 nuclear families all contributed to bringing down SRB to the normal biological level in the country  
9 [28–30]. As exemplified by the South Korean experience, it is possible to bring down the skewed  
10 SRB to the normal level by systematic and multi-pronged efforts.

11  
12  
13  
14  
15  
16  
17  
18 Bongaarts and Guilмото (2015) predict that the preference for sons and gender discriminations  
19 faced by the female sex from before birth that continues over a lifetime has manifested as three  
20 million excess female deaths every year globally, or 150 million missing women by 2035 [31].  
21 Our findings highlight the marginalized status of women in Nepal, and stress the urgent need for  
22 research and implementation of policies that reduce son preference and ultimately, skewed sex  
23 ratios. National strategies to prevent misuse of ultrasound services and gender-biased sex selection  
24 that do not hinder women's access to safe abortion services are needed. Most importantly,  
25 comprehensive interventions with a mix of laws, policies and advocacy campaigns that aim to  
26 improve the status of women and eliminate gender-based discrimination are needed to achieve a  
27 balanced sex ratio at birth and subsequent survival and quality of life.  
28  
29  
30  
31  
32  
33  
34  
35

36 Figure 1: Sex ratio at birth at study hospitals

37  
38 Figure 2: Predicted sex ratio at birth across women's education and parity

39  
40 Figure 3: Predicted knowledge of sex of current child before birth across women's education and  
41 parity

42  
43 Figure 4: Sex ratio at birth across women's education, parity and knowledge of sex of child before  
44 birth

45  
46 Figure 5: Sex ratio at birth of second birth order across women's education and living male child.

47  
48 Figure 6: Conditional sex ratio at birth of second order birth with no male sibling, comparison  
49 between hospital sample (study) and Nepal DHS across education groups

50  
51 Figure 7: Sex ratio at birth across socio-demographic characteristics between all births in the last  
52 three years, and second order births conditional on having an older sister  
53  
54  
55  
56  
57  
58  
59  
60

1  
2  
3 Acknowledgments: The analysis in this study is made possible with the time and effort by the  
4 women in the PPIUD project who participated in the research study about a day after giving birth.  
5 The authors would like to thank these women, and the thousands of women who took their time in  
6 participating in the 2011 Nepal DHS. We would also like to acknowledge the valiant effort from  
7 thousands of enumerators and program staff in the DHS and PPIUD project.  
8  
9

10  
11 We are grateful to Nepal Society of Obstetricians and Gynaecologists (NESOG) and International  
12 Federation of Obstetricians and Gynaecologists (FIGO) for implementing the intervention in the  
13 parent study that the paper is based on.  
14

15  
16 Contributorship statement: EP and ErP analysed the data and wrote the first draft of the  
17 manuscript. MP serves as principal investigator of the parent study. EP, ErP, MP, IS, MM and DM  
18 contributed to the development or revision of study instrument, or reviewed the manuscript and  
19 provided scientific oversight. EP, ErP, MP and IS read, edited and approved the final manuscript.  
20  
21

22 Competing Interests: None  
23

24  
25 Funding: This study was funded by a grant to the Harvard T. H. Chan School of Public Health  
26 from the Susan Thompson Buffett Foundation. The funding source had no role in the design,  
27 implementation, data collection, analysis and interpretation of results or in dissemination of  
28 findings.  
29

30  
31 Ethics approval and consent to participate: The study was approved by the Nepal Health  
32 Research Council, Nepal (#51/2015).  
33

34  
35 Availability of data and materials: The Demographic and health survey data is available from  
36 [the DHS program website](#). A sample of data from the parent longitudinal study will be made  
37 available for replication study upon request. The entire data set will also be made public at the end  
38 of the study. All data requests should be sent to the Program Coordinator Ms. Laura Campagna at  
39 [lcampagn@hsph.harvard.edu](mailto:lcampagn@hsph.harvard.edu).  
40  
41  
42  
43  
44  
45  
46  
47  
48  
49  
50  
51  
52  
53  
54  
55  
56

## REFERENCES

- 1 Guilmoto CZ. The Sex Ratio Transition in Asia. *Popul Dev Rev* 2009;31:39–49. doi:10.1111/j.1728-4457.2009.00295.x
- 2 Bélanger D, Thi Hai Oanh K, Jianye L, et al. Les rapports de masculinité à la naissance augmentent-ils au D % - Z [ *Population* 2003;58:255. doi:10.3917/popu.302.0255
- 3 Parazzini F, La Vecchia C, Levi F, et al. Trends in male:female ratio among newborn infants in 29 countries from five continents. *Hum Reprod* 1998;13:1394–6. doi:10.1093/humrep/13.5.1394
- 4 World Bank. *World Development Indicators 2017*. Washington, D.C.: : World Bank 2017.
- 5 Attane I (ed ), *Demography C for IC in NR in, Eng P (France), et al. Watering the neighbour's garden: the growing demographic female deficit in Asia*. Published Online First: 2007.<http://agris.fao.org/agris-search/search.do?recordID=XF2015028131> (accessed 28 Sep 2016).
- 6 Gupta MD, Chung W, Shuzhuo L. Evidence for an Incipient Decline in Numbers of Missing Girls in China and India. *Popul Dev Rev* 2009;35:401–16. doi:10.1111/j.1728-4457.2009.00285.x
- 7 Bhat PNM, Zavier AJF. Factors Influencing the Use of Prenatal Diagnostic Techniques and the Sex Ratio at Birth in India. *Econ Polit W* 2007;42:2292–303.
- 8 Urquia ML, Moineddin R, Jha P, et al. Sex ratios at birth after induced abortion. *CMAJ Can Med Assoc J* 2016;188:E181–90. doi:10.1503/cmaj.151074
- 9 Leone T, Matthews Z, Zuanna GD. Impact and Determinants of Sex Preference in Nepal. *Int Fam Plan Perspect* 2003;29:69–75. doi:10.2307/3181060
- 10 Grech V. Gendercide and femineglect. *Early Hum Dev* 2015;91:851–4. doi:10.1016/j.earlhumdev.2015.10.014
- 11 Frost MD, Puri M, Hinde PRA. Falling sex ratios and emerging evidence of sex-selective abortion in Nepal: evidence from nationally representative survey data. *BMJ Open* 2013;3:e002612. doi:10.1136/bmjopen-2013-002612
- 12 Puri M, Tamang A. *Understanding factors influencing adverse sex ratios at birth and exploring what works to achieve balance: The situation in selected districts of Nepal. Kathmandu, Nepal: : CREHPA 2015.*
- 13 Government of Nepal. *National Safe Abortion Service Policy, 2060 B.S.*

- 14 Lamichhane P, Harken T, Puri M, et al. Sex-Selective Abortion in Nepal: A Qualitative Study of Health Workers' Perspectives. *Womens Health Issues* 2011;21:S37–41. doi:10.1016/j.whi.2011.02.001
- 15 Ministry of Health and Population (MOHP) [Nepal], New ERA, and Macro International Inc. *Nepal Demographic and Health Survey 2011*. Kathmandu, Nepal: : Ministry of Health and Population, New ERA, and Macro International Inc. 2012.
- 16 Canning D, Shah IH, Pearson E, et al. Institutionalizing postpartum intrauterine device (IUD) services in Sri Lanka, Tanzania, and Nepal: study protocol for a cluster-randomized stepped-wedge trial. *BMC Pregnancy Childbirth* 2016;16:362. doi:10.1186/s12884-016-1160-0
- 17 Jha P, Kumar R, Vasa P, et al. Low male-to-female sex ratio of children born in India: national survey of 1.1 million households. *The Lancet* 2006;367:211–8. doi:10.1016/S0140-6736(06)67930-0
- 18 Jha P, Kesler MA, Kumar R, et al. Trends in selective abortions of girls in India: analysis of nationally representative birth histories from 1990 to 2005 and census data from 1991 to 2011. *The Lancet* 2013;377:1921–8. doi:10.1016/S0140-6736(11)60649-1
- 19 Fukuda M, Fukuda K, Mason S, et al. The sex ratio at birth after recent major earthquakes in Japan. *Early Hum Dev* 2018;123:30–1. doi:10.1016/j.earlhumdev.2018.06.002
- 20 Bertrand M, Duflo E, Mullainathan S. How Much Should We Trust Differences-In-Differences Estimates? *Q J Econ* 2004;119:249–75. doi:10.1162/003355304772839588
- 21 Cameron AC, Gelbach JB, Miller DL. Bootstrap-Based Improvements for Inference with Clustered Errors. *Rev Econ Stat* 2008;90:414–27. doi:10.1162/rest.90.3.414
- 22 Webb MD. Reworking Wild Bootstrap Based Inference for Clustered Errors. Queen's University, Department of Economics 2014. <https://ideas.repec.org/p/qed/wpaper/1315.html> (accessed 16 Dec 2016).
- 23 Roodman D. BOOTTEST: Stata module to provide fast execution of the wild bootstrap with null imposed. Boston College Department of Economics 2016. <https://ideas.repec.org/c/boc/bocode/s458121.html> (accessed 16 Dec 2016).
- 24 Central Bureau of Statistics. *Population Monograph of Nepal*. Kathmandu, Nepal: : National Planning Commission Secretariat, Government of Nepal 2014.
- 25 Ministry of Health, Nepal, New ERA, ICF. *Nepal Demographic and Health Survey 2016*. Kathmandu, Nepal: Ministry of Health, Nepal 2017. <http://dhsprogram.com/pubs/pdf/FR257/FR257.pdf>
- 26 Statistics Korea, Republic of Korea. Korean statistical information service. <http://kosis.kr/eng/> (accessed 12 Jan 2018).



- 1  
2  
3 27 Chung W, Gupta MD. The Decline of Son Preference in South Korea: The Roles of  
4 Development and Public Policy. *Popul Dev Rev* 2007;33:757–83. doi:10.1111/j.1728-  
5 4457.2007.00196.x  
6  
7  
8 28 Park CB, Cho N-H. Consequences of Son Preference in a Low-Fertility Society: Imbalance  
9 of the Sex Ratio at Birth in Korea. *Popul Dev Rev* 1995;21:59–84. doi:10.2307/2137413  
10  
11 29 Hesketh T, Lu L, Xing ZW. The consequences of son preference and sex-selective abortion  
12 in China and other Asian countries. *Can Med Assoc J* 2011;183:1374–7.  
13 doi:10.1503/cmaj.101368  
14  
15 30 Chun H, Das Gupta M. Gender discrimination in sex selective abortions and its transition in  
16 South Korea. *Womens Stud Int Forum* 2009;32:89–97. doi:10.1016/j.wsif.2009.03.008  
17  
18 31 Bongaarts J, Guilamoto CZ. How Many More Missing Women? Excess Female Mortality and  
19 Prenatal Sex Selection, 1970–2050. *Popul Dev Rev* 2015;41:241–69. doi:10.1111/j.1728-  
20 4457.2015.00046.x  
21  
22  
23  
24  
25  
26  
27  
28  
29  
30  
31  
32  
33  
34  
35  
36  
37  
38  
39  
40  
41  
42  
43  
44  
45  
46  
47  
48  
49  
50  
51  
52  
53  
54  
55  
56  
57  
58  
59  
60

1  
2  
3  
4  
5  
6  
7  
8  
9  
10  
11  
12  
13  
14  
15  
16  
17  
18  
19  
20  
21  
22  
23  
24  
25  
26  
27  
28  
29  
30  
31  
32  
33  
34  
35  
36  
37  
38  
39  
40  
41  
42  
43  
44  
45  
46  
47  
48  
49  
50  
51  
52  
53  
54  
55  
56  
57  
58  
59  
60



Figure 1: Sex ratio at birth at study hospitals

81x40mm (300 x 300 DPI)

1  
2  
3  
4  
5  
6  
7  
8  
9  
10  
11  
12  
13  
14  
15  
16  
17  
18  
19  
20  
21  
22  
23  
24  
25  
26  
27  
28  
29  
30  
31  
32  
33  
34  
35  
36  
37  
38  
39  
40  
41  
42  
43  
44  
45  
46  
47  
48  
49  
50  
51  
52  
53  
54  
55  
56  
57  
58  
59  
60



Figure 2: Predicted sex ratio at birth across women's education and parity

81x46mm (300 x 300 DPI)

1  
2  
3  
4  
5  
6  
7  
8  
9  
10  
11  
12  
13  
14  
15  
16  
17  
18  
19  
20  
21  
22  
23  
24  
25  
26  
27  
28  
29  
30  
31  
32  
33  
34  
35  
36  
37  
38  
39  
40  
41  
42  
43  
44  
45  
46  
47  
48  
49  
50  
51  
52  
53  
54  
55  
56  
57  
58  
59  
60



Figure 3: Predicted knowledge of sex of current child before birth across women's education and parity

81x47mm (300 x 300 DPI)



Figure 4: Sex ratio at birth across women's education, parity and knowledge of sex of child before birth

86x40mm (300 x 300 DPI)

1  
2  
3  
4  
5  
6  
7  
8  
9  
10  
11  
12  
13  
14  
15  
16  
17  
18  
19  
20  
21  
22  
23  
24  
25  
26  
27  
28  
29  
30  
31  
32  
33  
34  
35  
36  
37  
38  
39  
40  
41  
42  
43  
44  
45  
46  
47  
48  
49  
50  
51  
52  
53  
54  
55  
56  
57  
58  
59  
60



Figure 5: Sex ratio at birth of second birth order across women's education and living male child.

81x47mm (300 x 300 DPI)



Figure 6: Conditional sex ratio at birth of second order birth with no male sibling, comparison between hospital sample (study) and Nepal DHS across education groups

81x47mm (300 x 300 DPI)

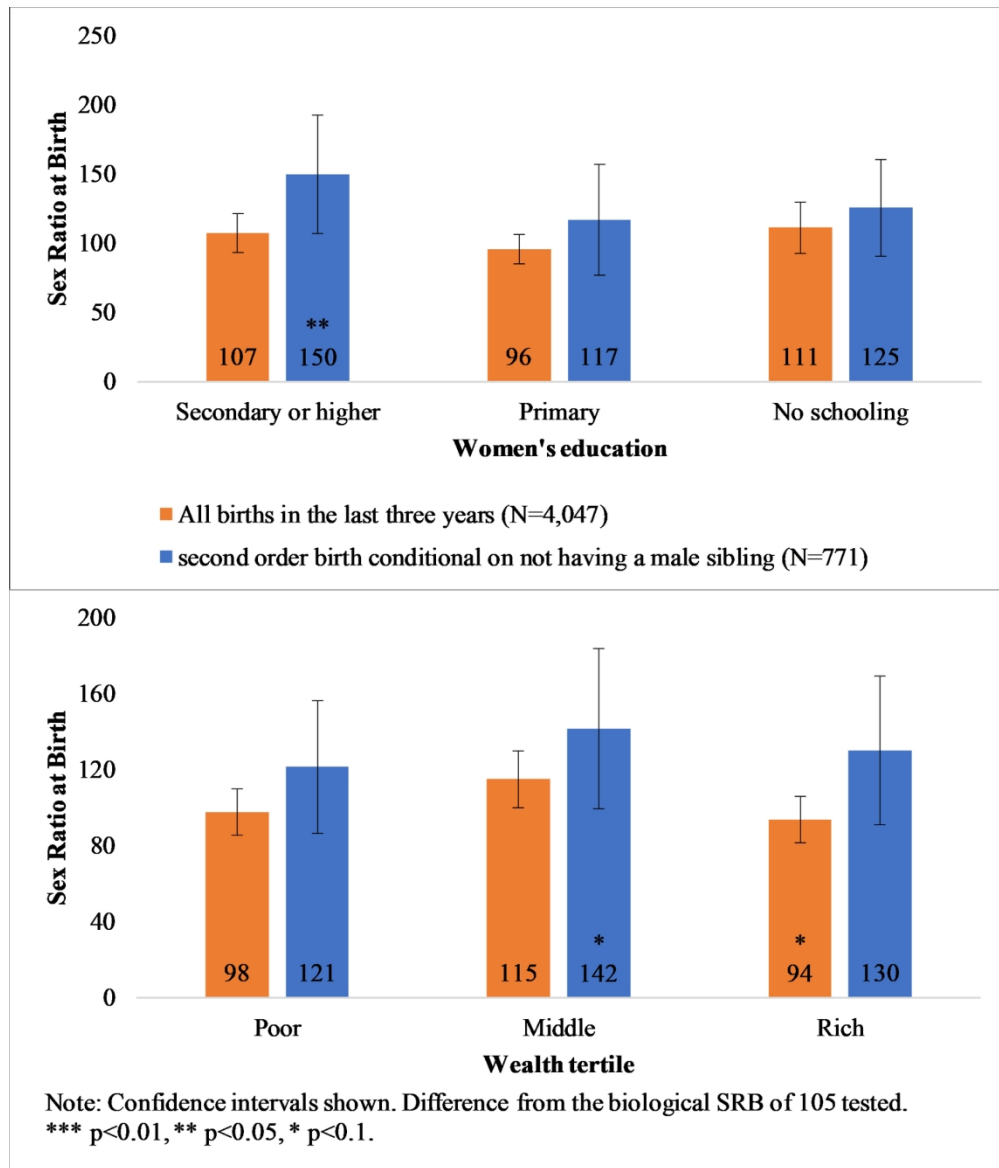

Figure 7: Sex ratio at birth across socio-demographic characteristics between all births in the last three years, and second order births conditional on having an older sister

162x189mm (300 x 300 DPI)



APPENDIX

Appendix Figure 1: Composition of ethnic groups seeking care in study hospitals

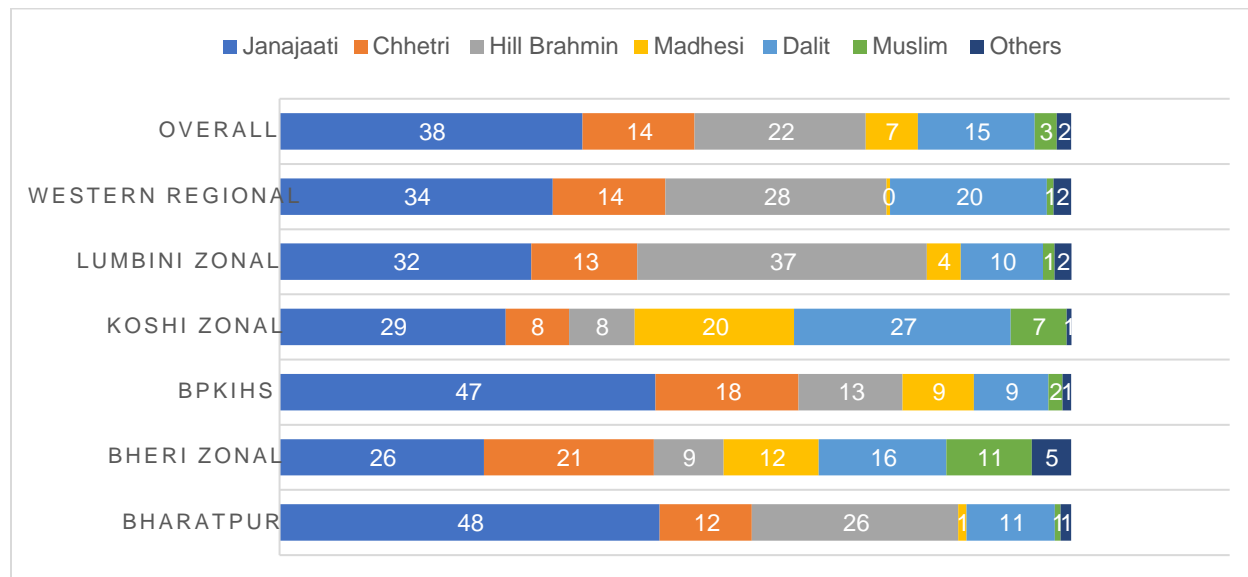

review only

Appendix Table 1: Descriptive statistics for study data<sup>2</sup> proportions and sample size

|                                                               | Full Sample | Follow-up Sample | DHS sample |
|---------------------------------------------------------------|-------------|------------------|------------|
| Male birth                                                    | 0.54        | 0.54             | 0.51       |
| Mother's age                                                  |             |                  |            |
| <20                                                           | 0.14        | 0.13             | 0.09       |
| 20-24                                                         | 0.45        | 0.45             | 0.37       |
| 25-29                                                         | 0.28        | 0.29             | 0.30       |
| •                                                             | 0.13        | 0.12             | 0.24       |
| Mother's education                                            |             |                  |            |
| Secondary or higher                                           | 0.81        | 0.82             | 0.48       |
| Primary                                                       | 0.10        | 0.09             | 0.20       |
| No schooling                                                  | 0.09        | 0.09             | 0.32       |
| Parity                                                        |             |                  |            |
| 1                                                             | 0.58        | 0.55             | 0.24       |
| 2                                                             | 0.32        | 0.34             | 0.32       |
| 3&+                                                           | 0.10        | 0.11             | 0.45       |
| Ethnicity                                                     |             |                  |            |
| Janajaati                                                     | 0.38        | 0.35             |            |
| Chhetri                                                       | 0.14        | 0.14             |            |
| Hill Brahmin                                                  | 0.22        | 0.23             |            |
| Madhesi                                                       | 0.07        | 0.07             |            |
| Dalit                                                         | 0.15        | 0.15             |            |
| Muslim                                                        | 0.03        | 0.03             |            |
| Others                                                        | 0.02        | 0.02             |            |
| Region                                                        |             |                  |            |
| Terai                                                         | 0.71        | 0.76             |            |
| Hill                                                          | 0.28        | 0.24             |            |
| Mountain                                                      | 0.01        | 0.00             |            |
| Number of induced abortions                                   |             |                  |            |
| 0                                                             | 0.96        | 0.96             |            |
| 1                                                             | 0.04        | 0.04             |            |
| 2+                                                            | 0.01        | 0.01             |            |
| Conducted ultrasound during antenatal period of current birth |             | 0.93             |            |
| Knew sex of current child                                     |             | 0.13             |            |
| Total sample size for each data sample                        | 75,428      | 14,015           | 4,047      |
